# Supplementary material for: Synthesis of novel piperazine-based bis(thiazole)(1,3,4-thiadiazole) hybrids as anti-cancer agents through caspase-dependent apoptosis
Source: Royal Society of Chemistry journal article supplement (doi:10.1039/d4ra05091f), 2024-01-01
Supplement: d4ra05091f1.pdf [file d4ra05091f1.pdf]

# **Synthesis of novel piperazine-based bis(thiazole)(1,3,4-thiadiazole) hybrids as anti-cancer agents through caspase-dependent apoptosis**

**Doaa M. Mohamed<sup>a</sup>, Nabila A. Kheder<sup>a</sup>, Marwa Sharaky<sup>b</sup>, Mohamed S. Nafie<sup>c,d</sup>, Kamal M. Dawood<sup>a\*</sup>, Ashraf A. Abbas<sup>a\*</sup>**

<sup>a</sup> Department of Chemistry, Faculty of Science, Cairo University, Giza 12613, Egypt.

<sup>b</sup> Pharmacology Unit, Cancer Biology Department, National Cancer Institute, Cairo University, Cairo, Egypt.

<sup>c</sup> Department of Chemistry, College of Sciences, University of Sharjah, P.O. 27272, Sharjah, United Arab Emirates

<sup>d</sup> Department of Chemistry, Faculty of Science, Suez Canal University, Ismailia, 41522, Egypt.

Corresponding author 1: K. M. Dawood: E-Mail: [kmdawood@sci.cu.edu.eg](mailto:kmdawood@sci.cu.edu.eg), Tel: (+202) 35676602, Fax: (+202) 35727556; ORCID: 0000-0002-1351-9886

Corresponding author 2: A. A. Abbas: E-mail: [ashrafabbas@cu.edu.eg](mailto:ashrafabbas@cu.edu.eg), Fax: (+202) 35727556; ORCID: 0000-0001-7061-9907

## **Spectral data**

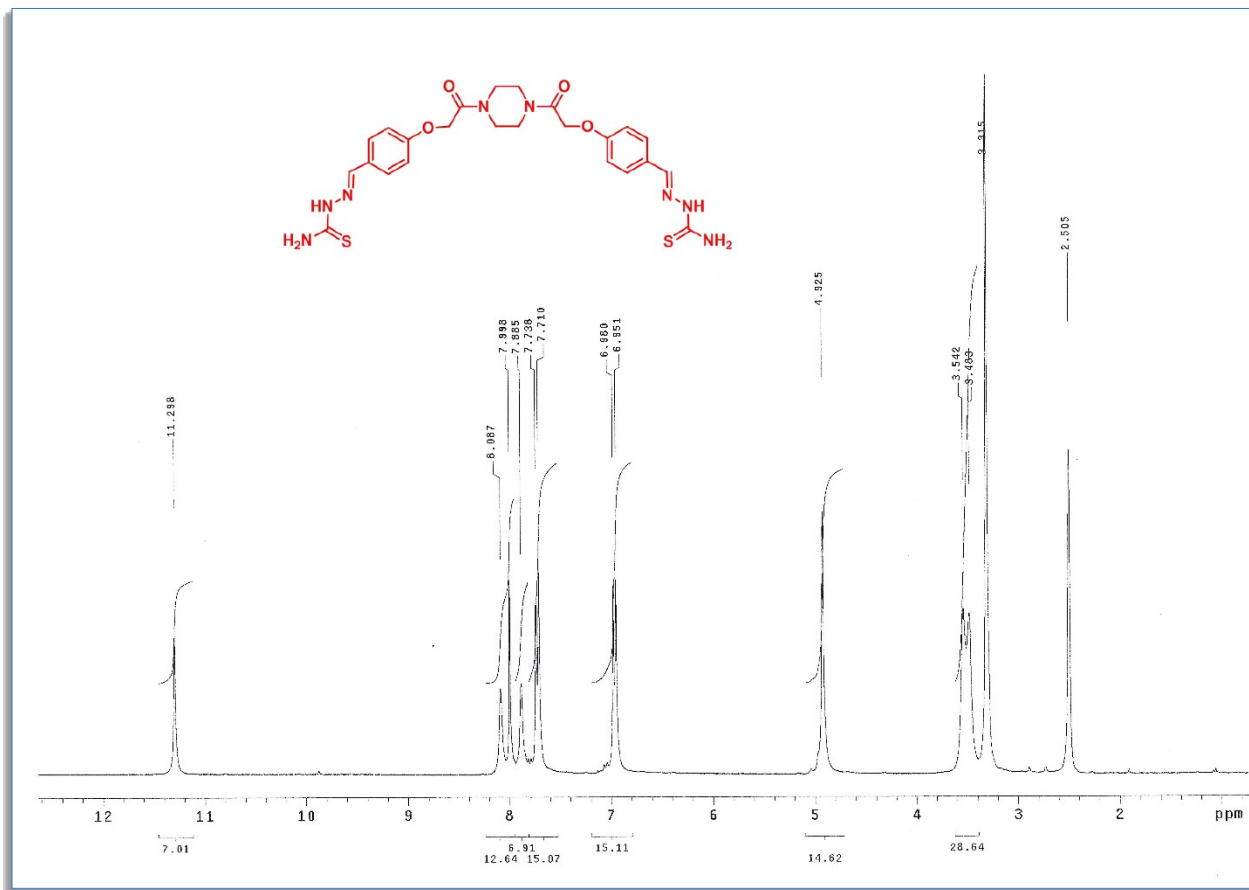

Fig. S1. <sup>1</sup>H NMR spectrum of 7a

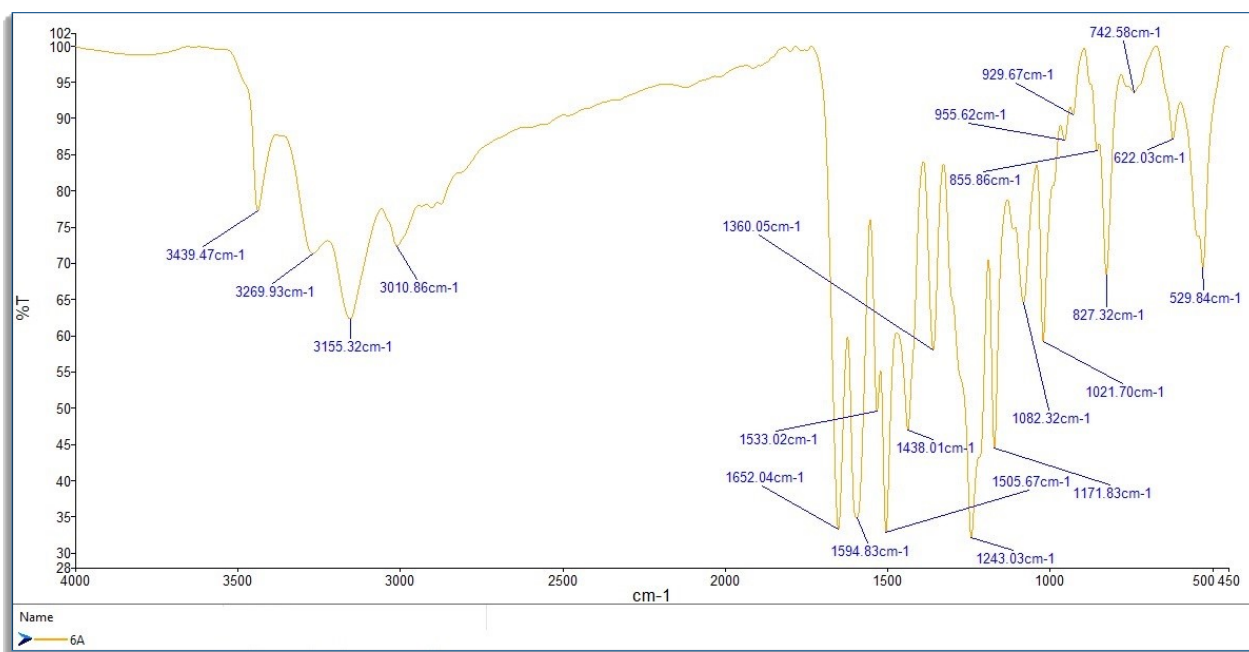

Fig. S2. IR spectrum of 7a

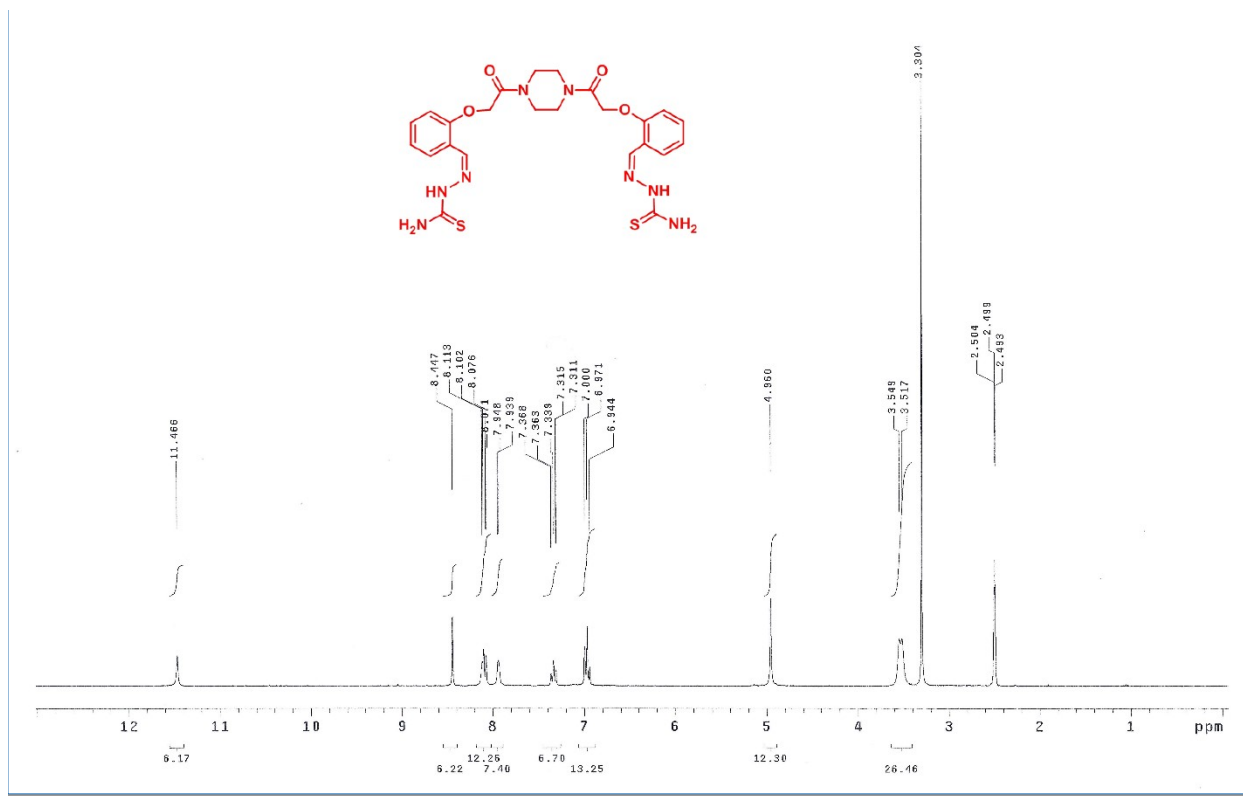

Fig. S3. <sup>1</sup>H NMR spectrum of 7b

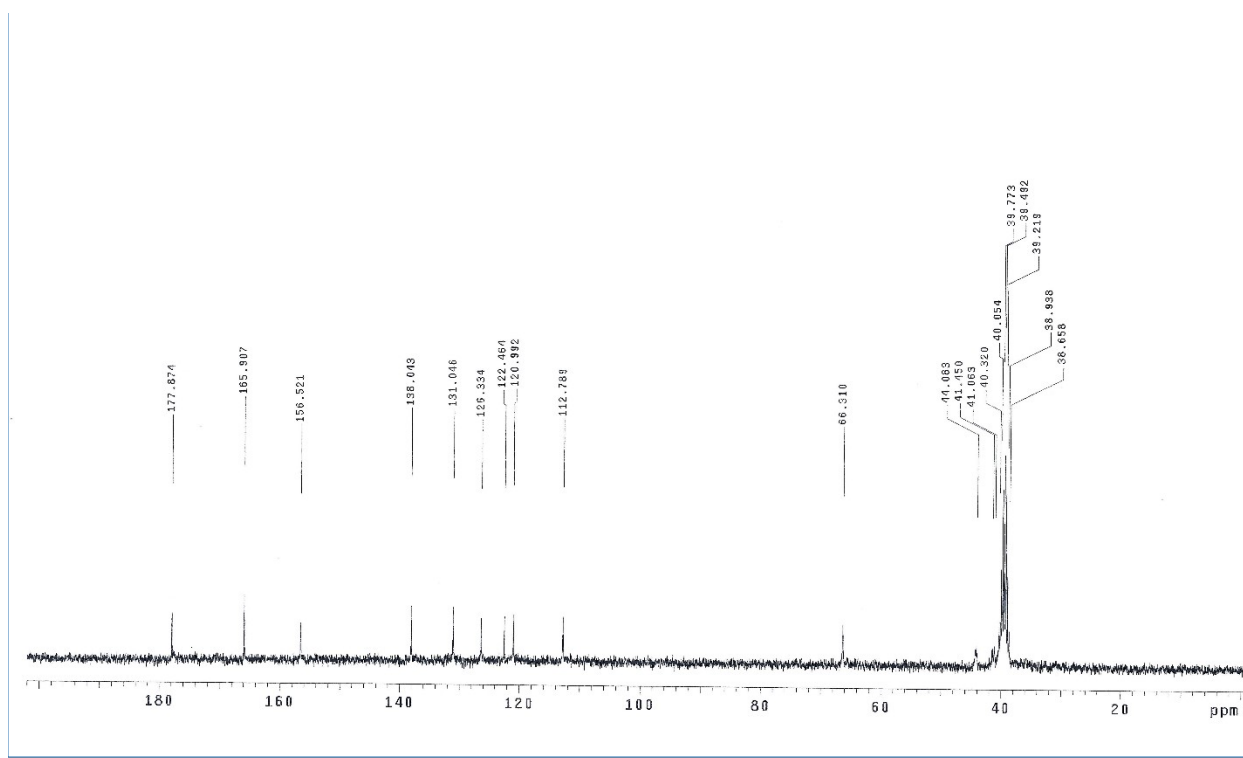

Fig. S4. <sup>13</sup>C NMR spectrum of 7b

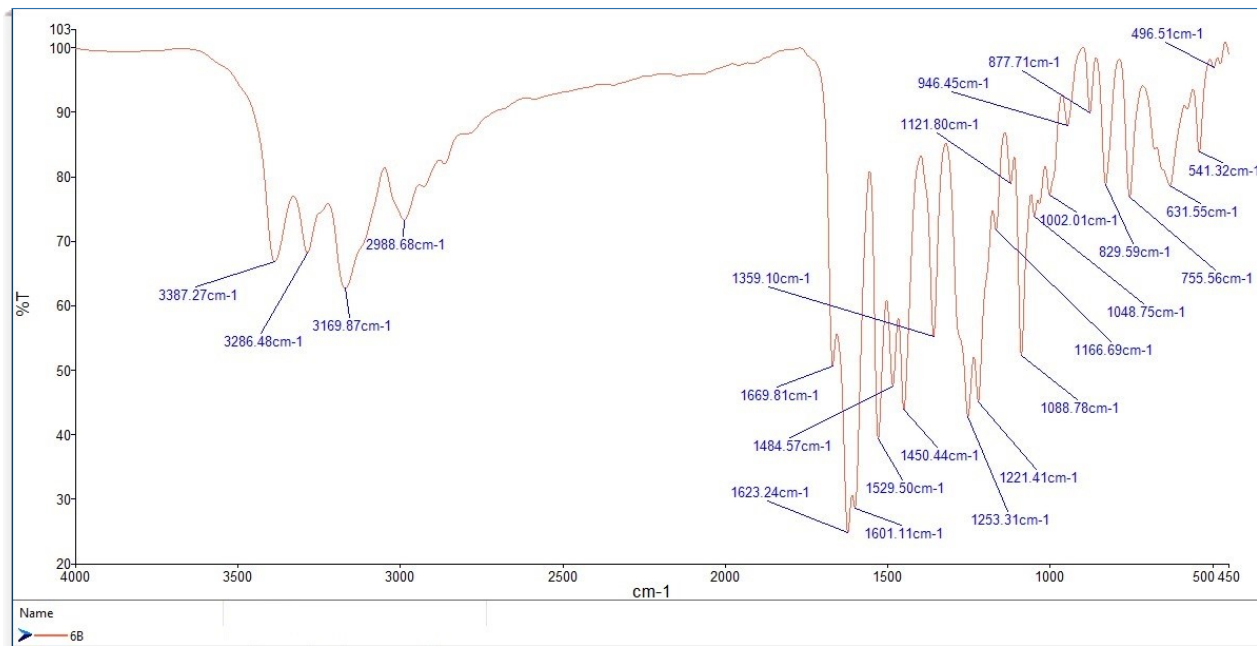

Fig. S5. IR spectrum of 7b

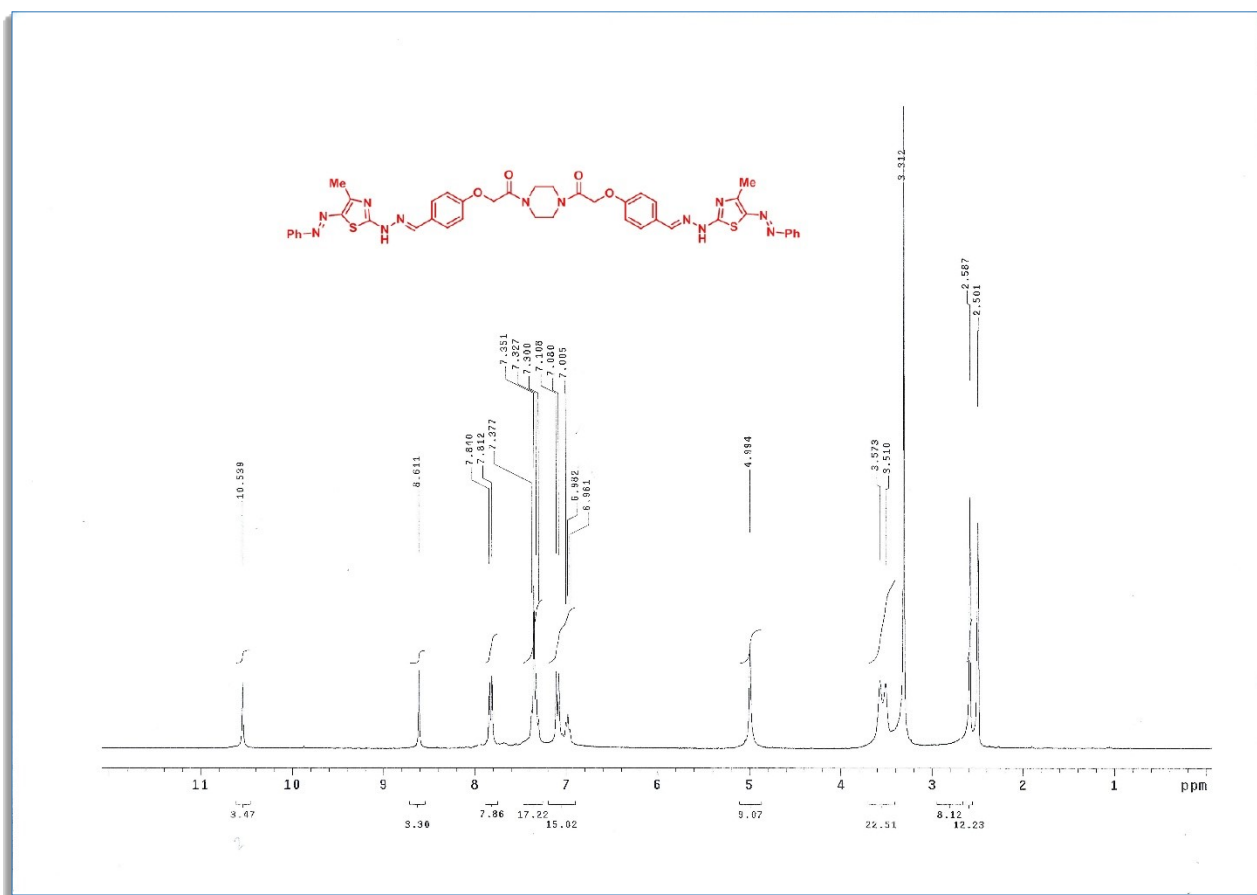

Fig. S6. <sup>1</sup>H NMR spectrum of 9a

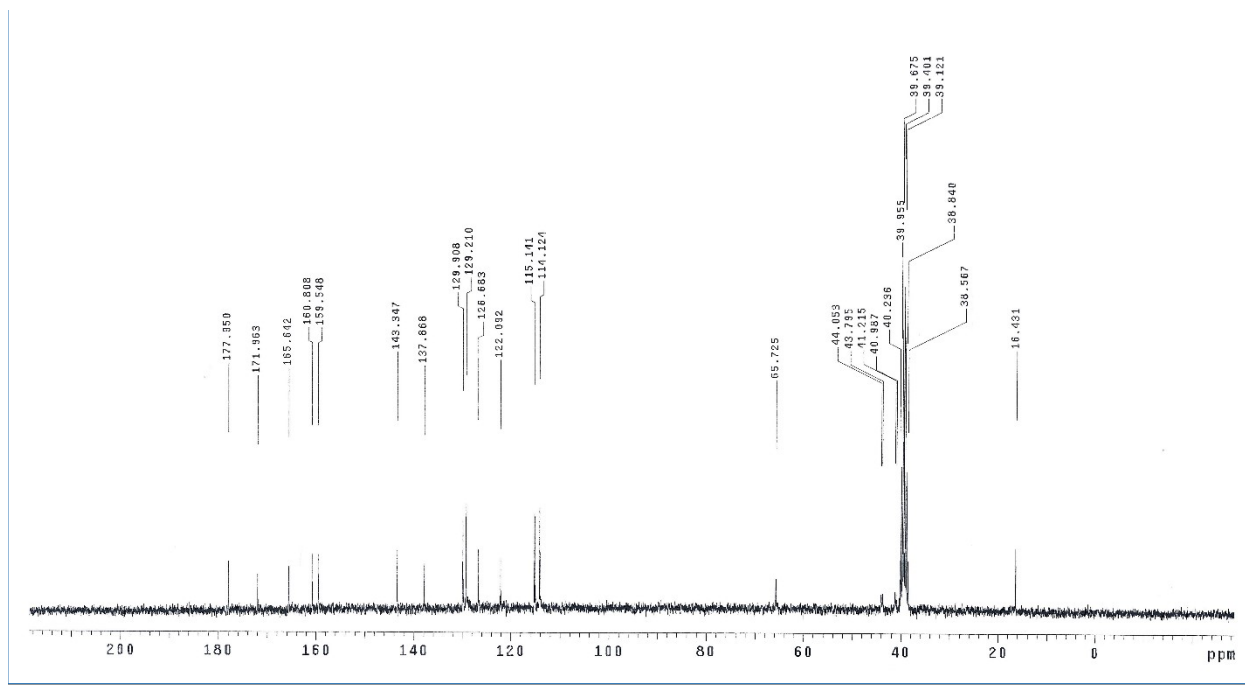

**Fig. S7.**  $^{13}\text{C}$  NMR spectrum of **9a**

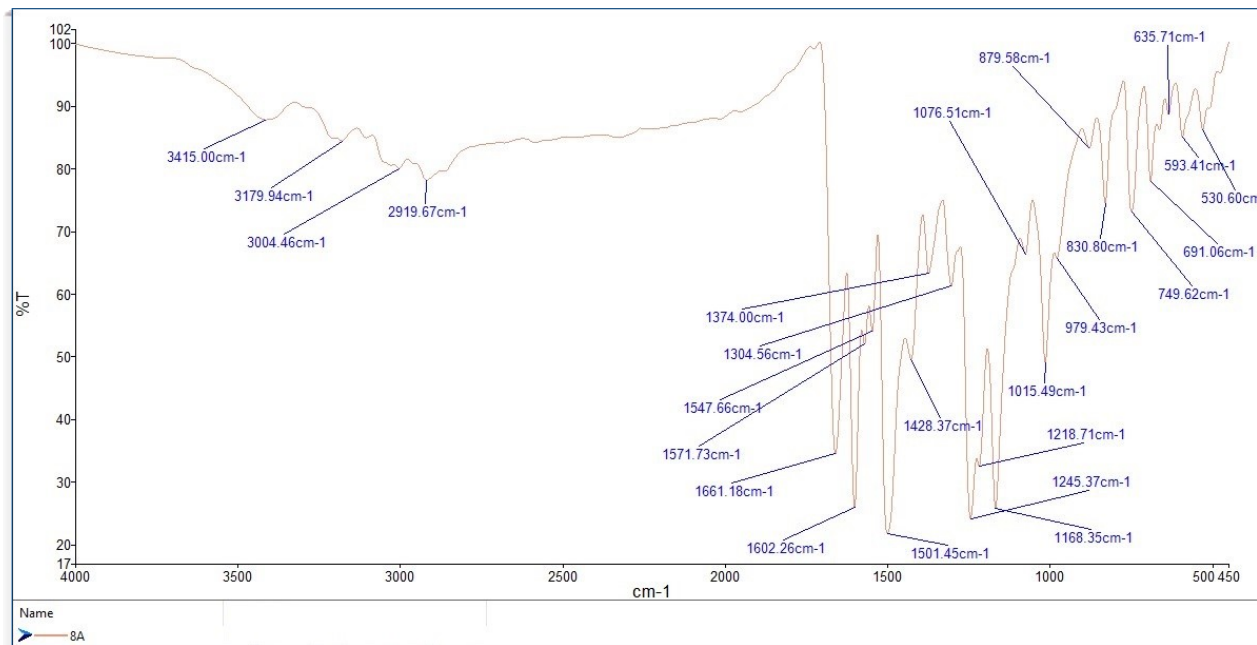

**Fig. S8.** IR spectrum of **9a**

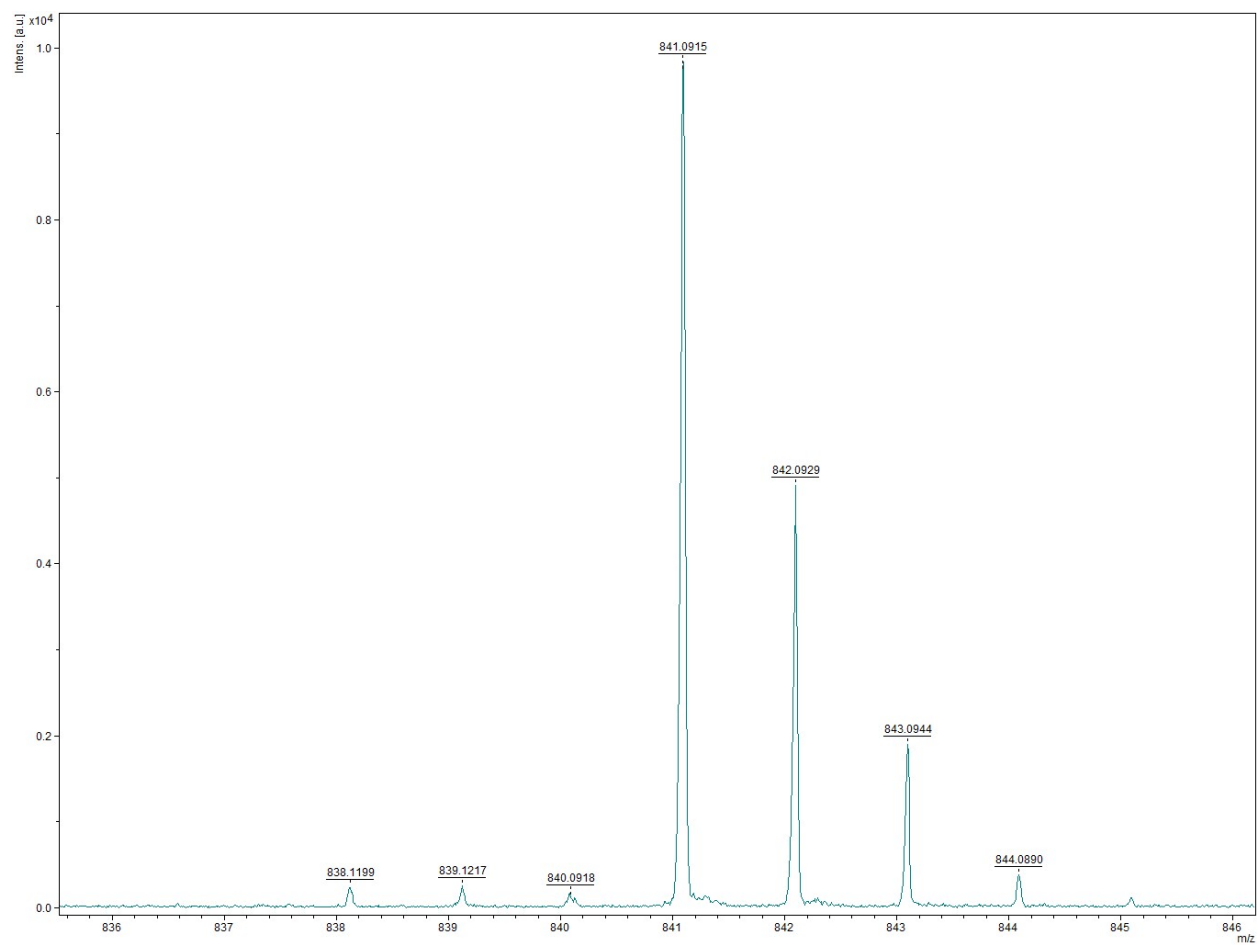

**Fig. S9.** Mass spectrum of **9a**

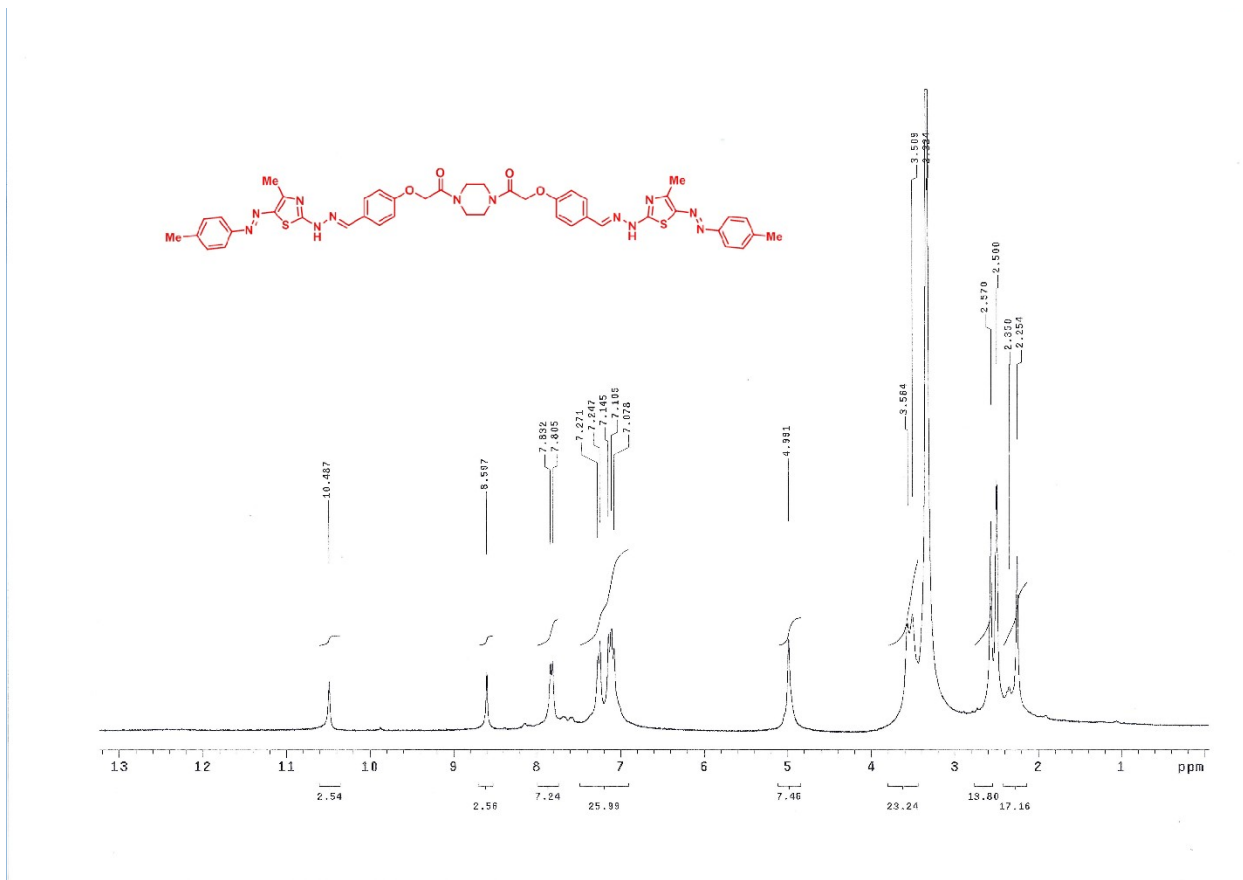

Fig. S10. <sup>1</sup>H NMR spectrum of **9b**

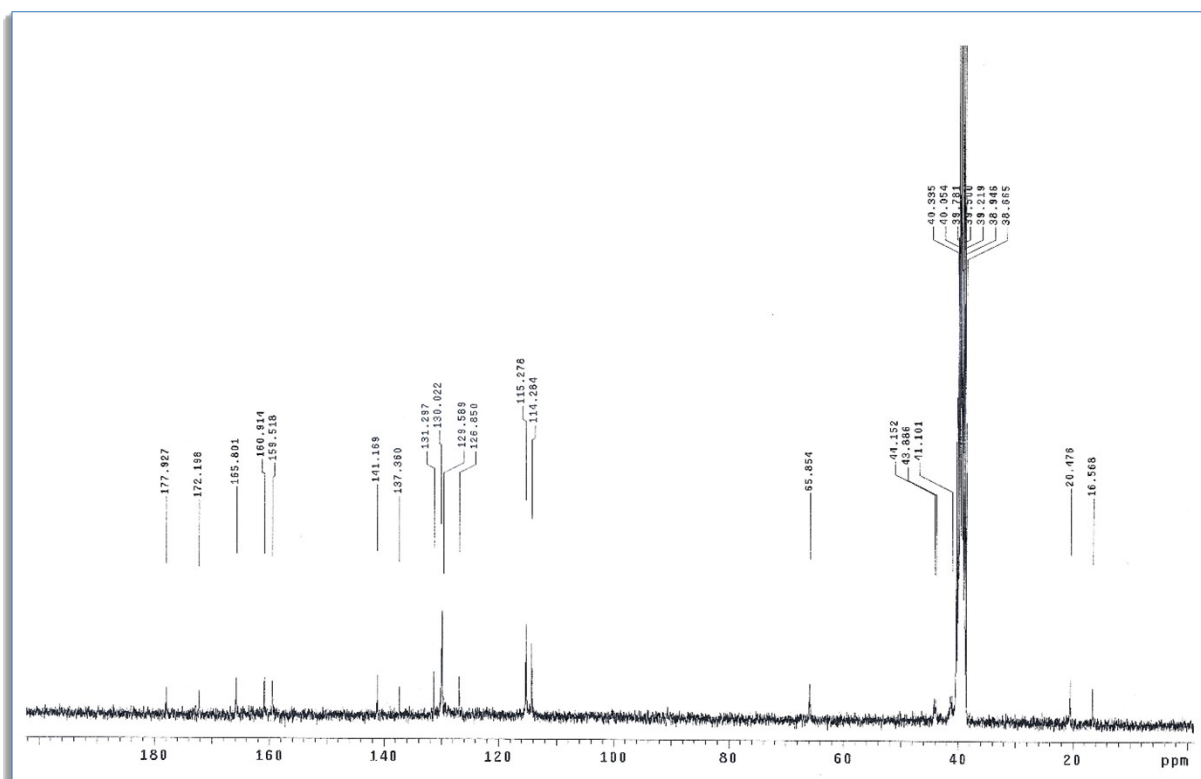

Fig. S11. <sup>13</sup>C NMR spectrum of **9b**

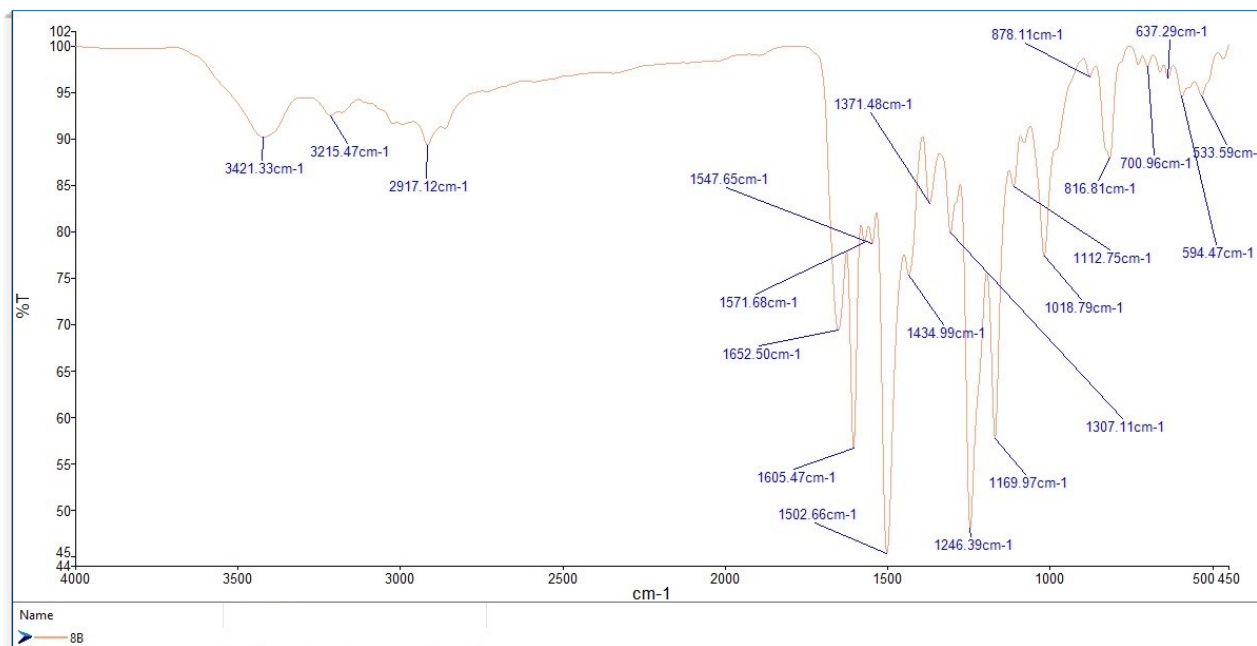

**Fig. S12.** IR spectrum of **9b**

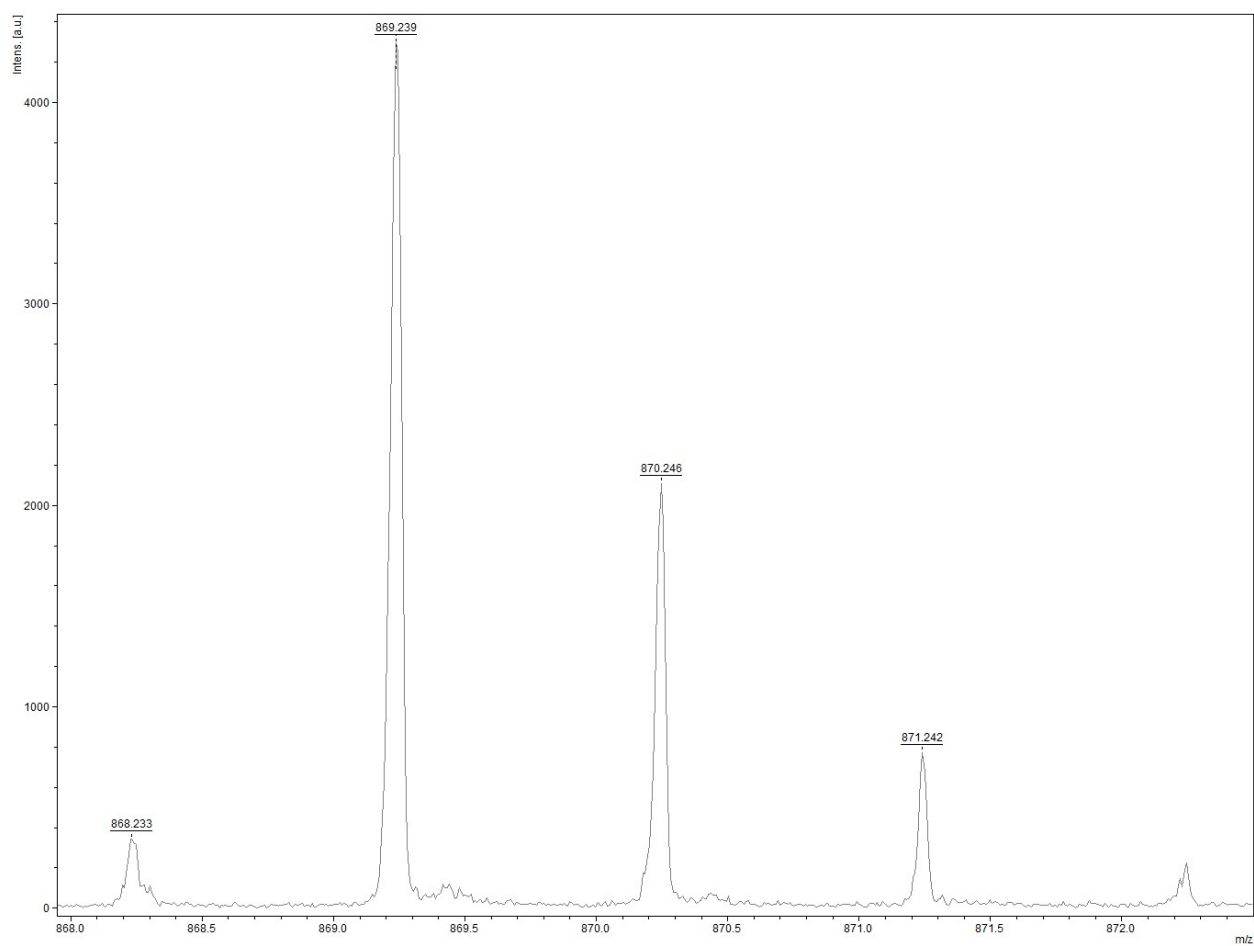

**Fig. S13.** Mass spectrum of **9b**



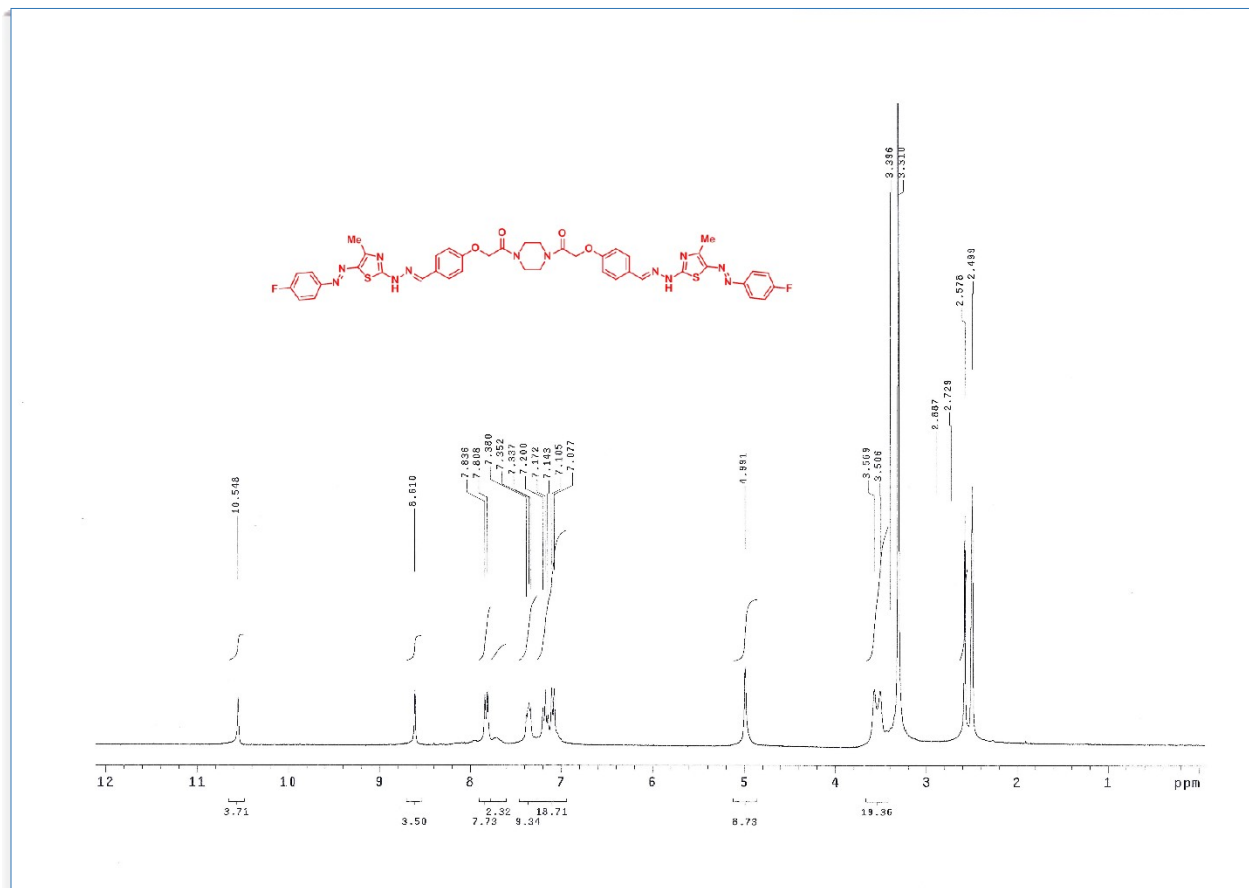

**Fig. S14.**  $^1\text{H NMR}$  spectrum of **9c**

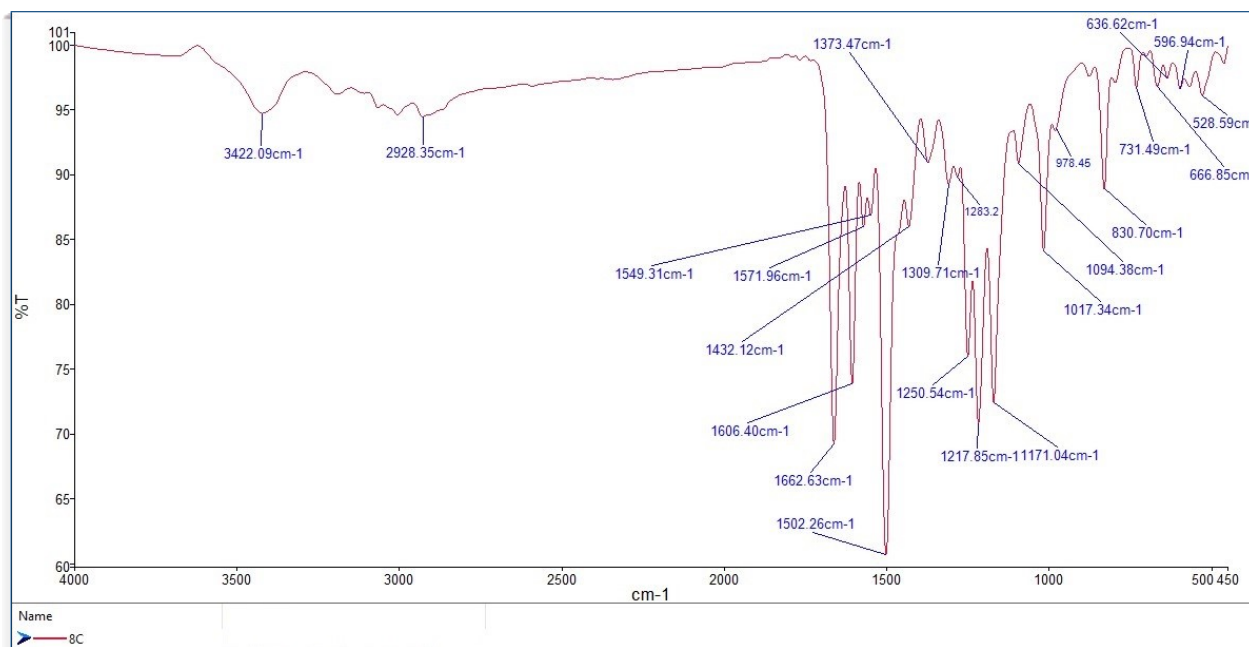

**Fig. S15.** IR spectrum of **9c**

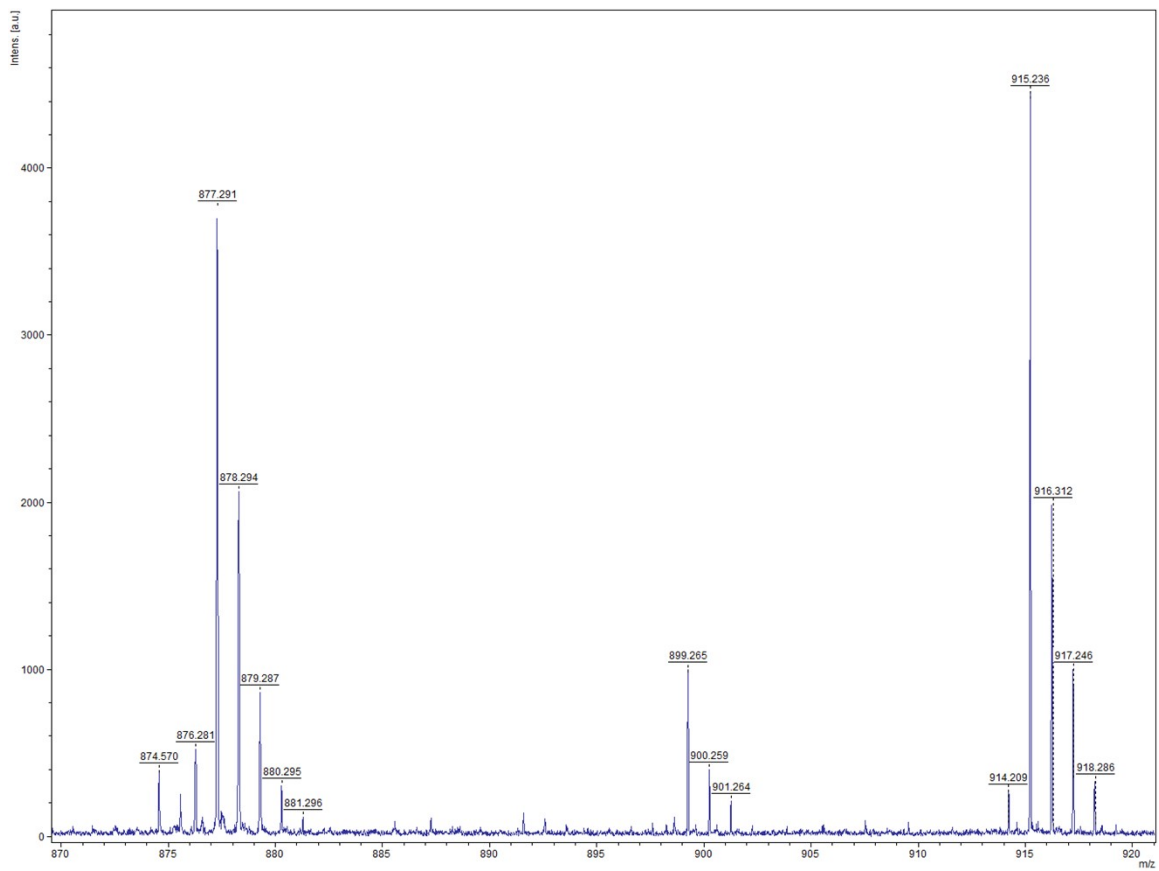

Fig. S16. Mass spectrum of 9c

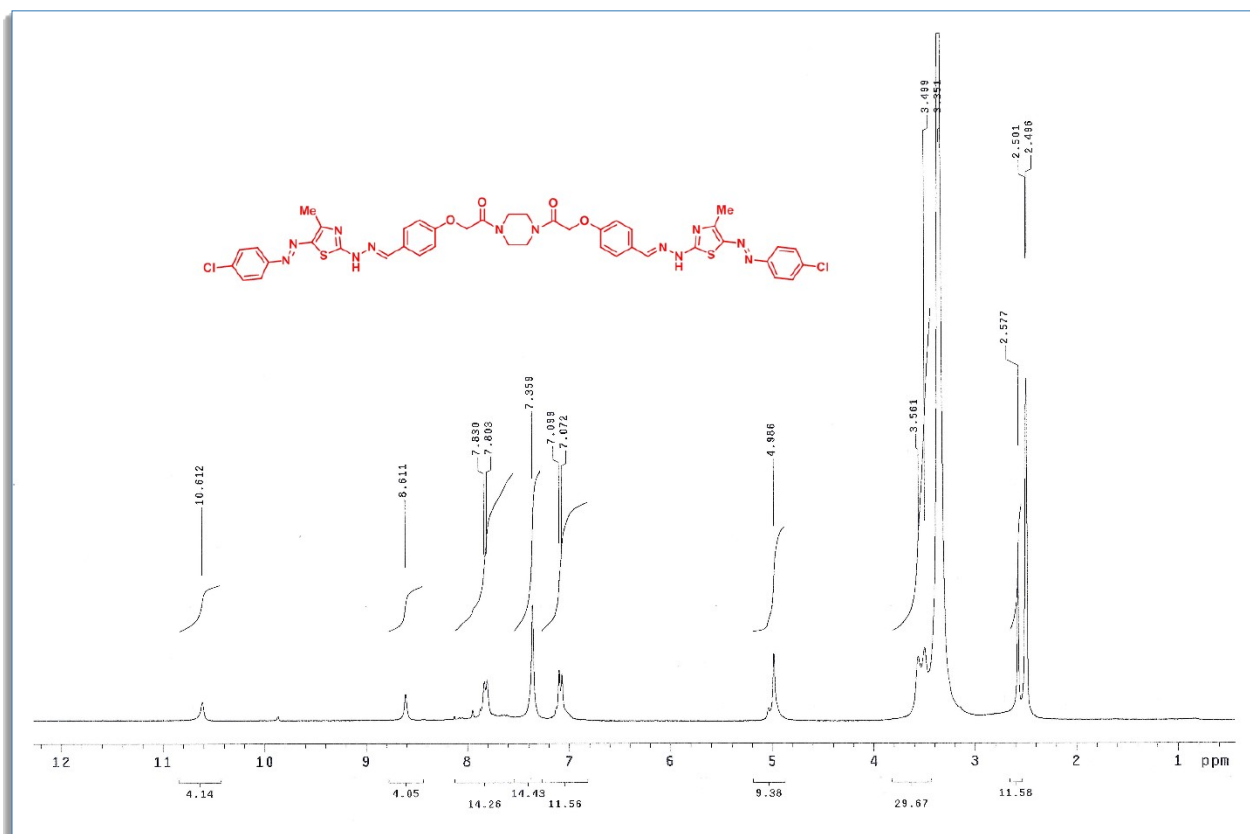

Fig. S17. <sup>1</sup>H NMR spectrum of 9d

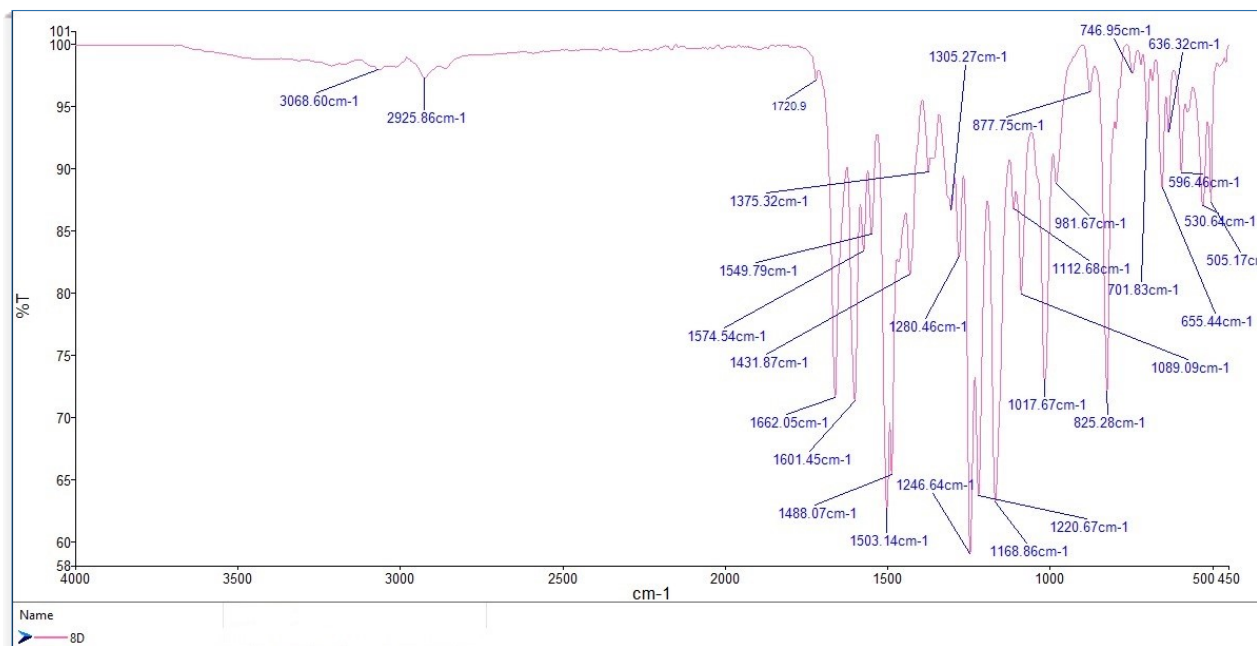

Fig. S18. IR spectrum of 9d

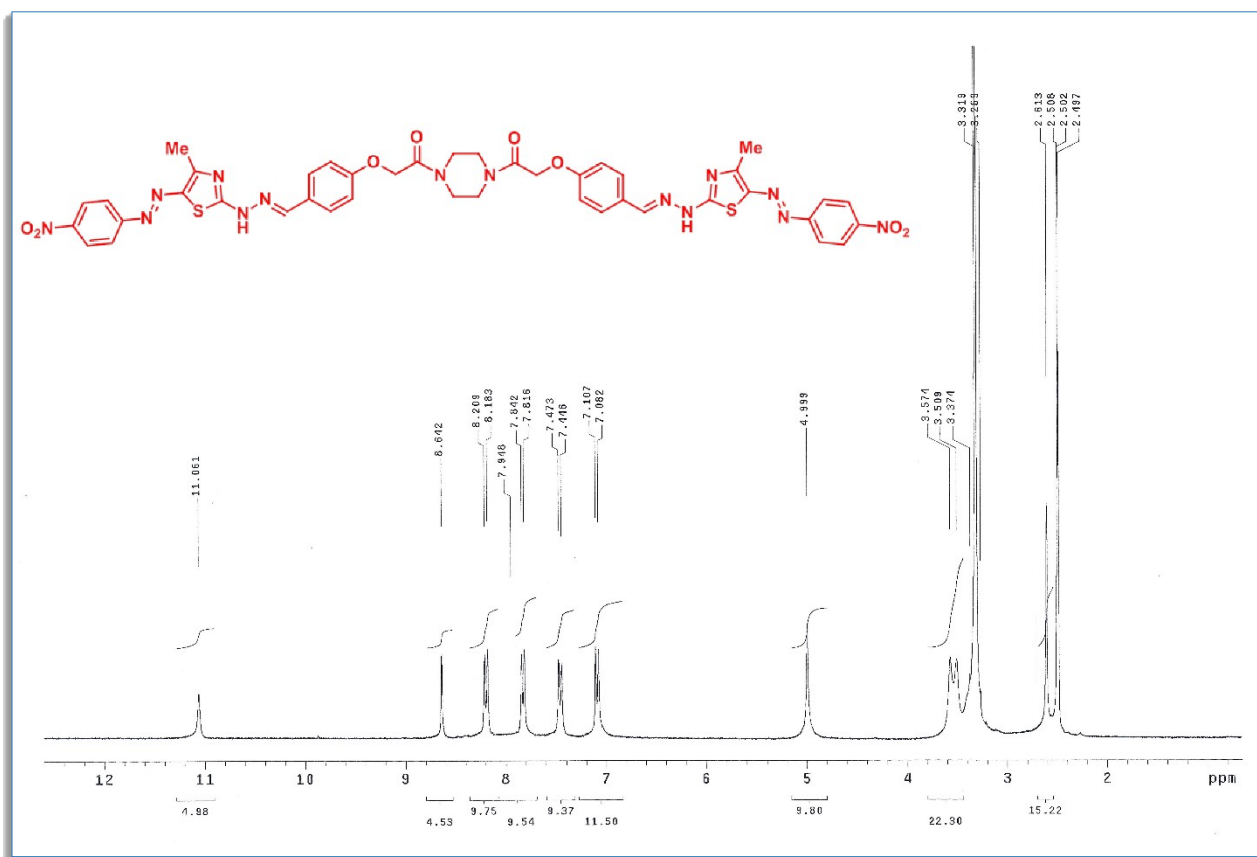

Fig. S19. <sup>1</sup>H NMR spectrum of 9e

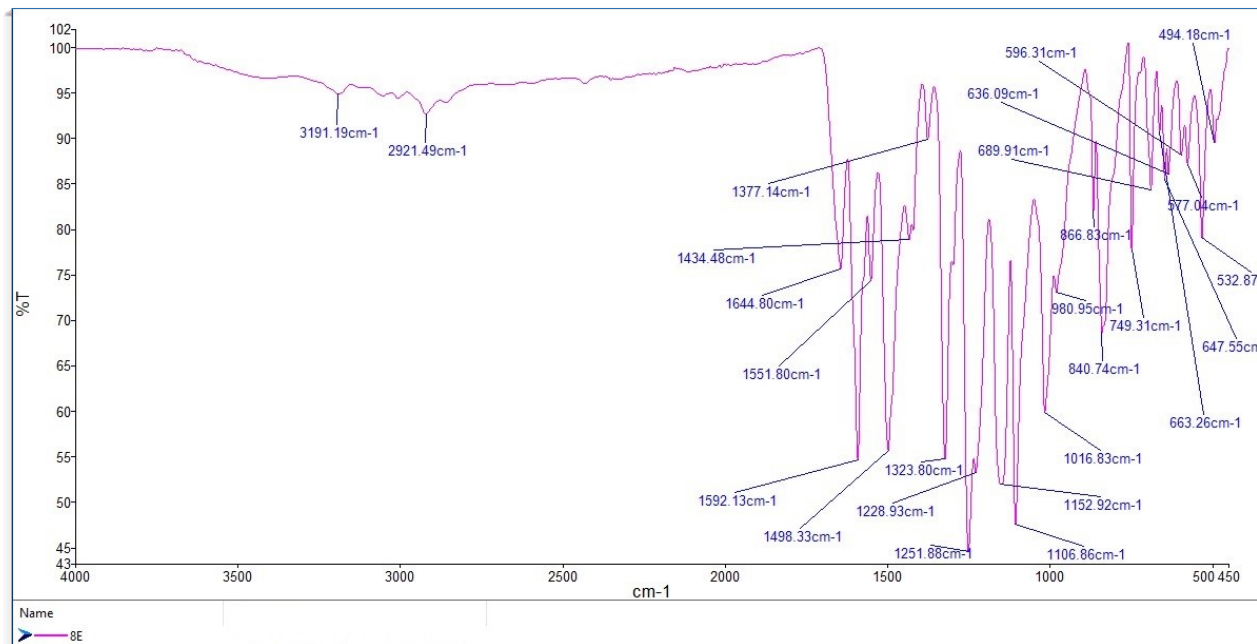

Fig. S20. IR spectrum of 9e

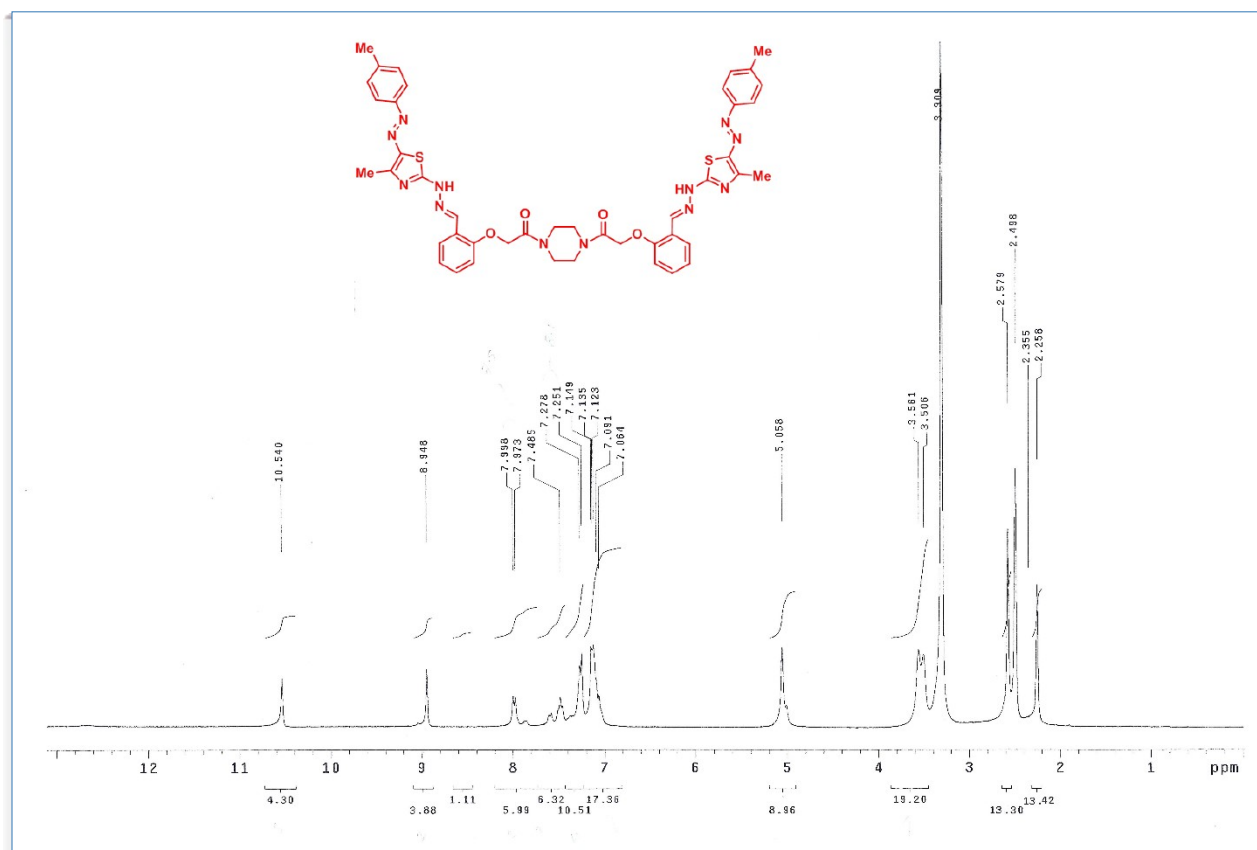

Fig. S21. <sup>1</sup>H NMR spectrum of 9f

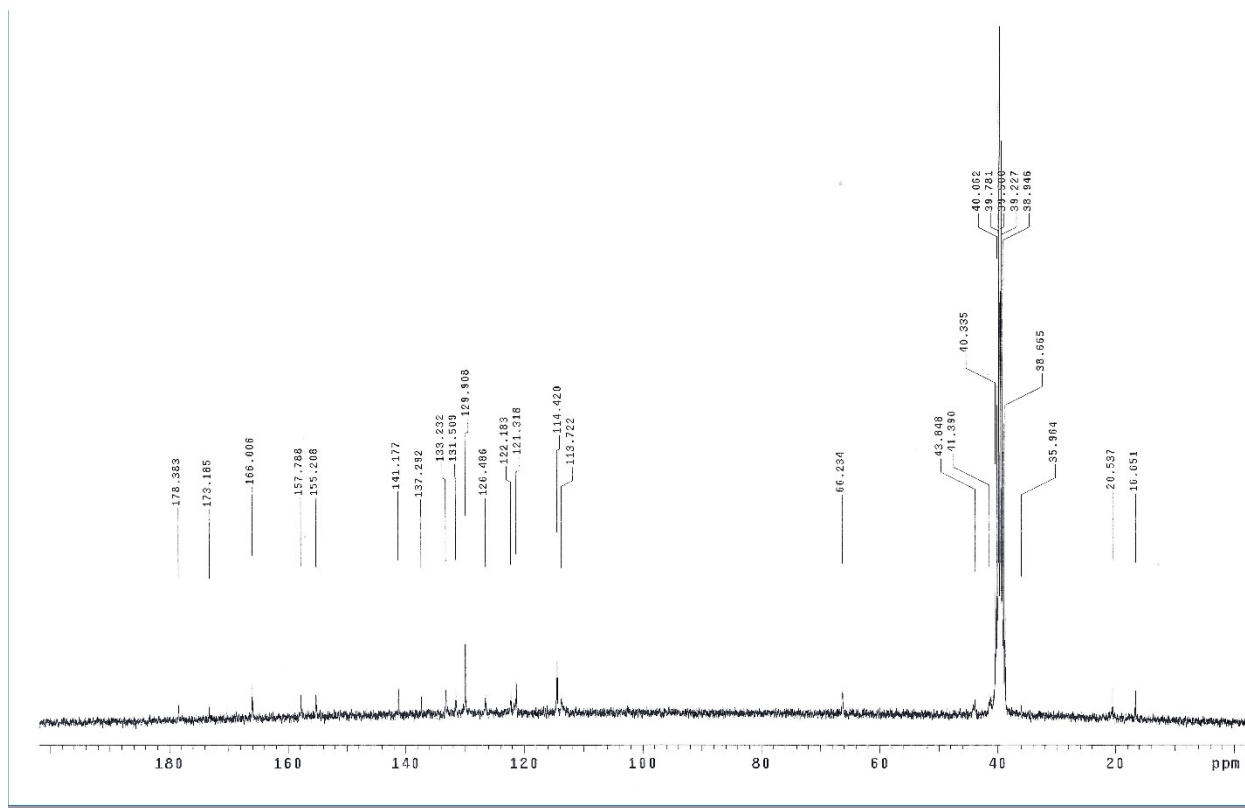

Fig. S22.  $^{13}\text{C}$  NMR spectrum of **9f**

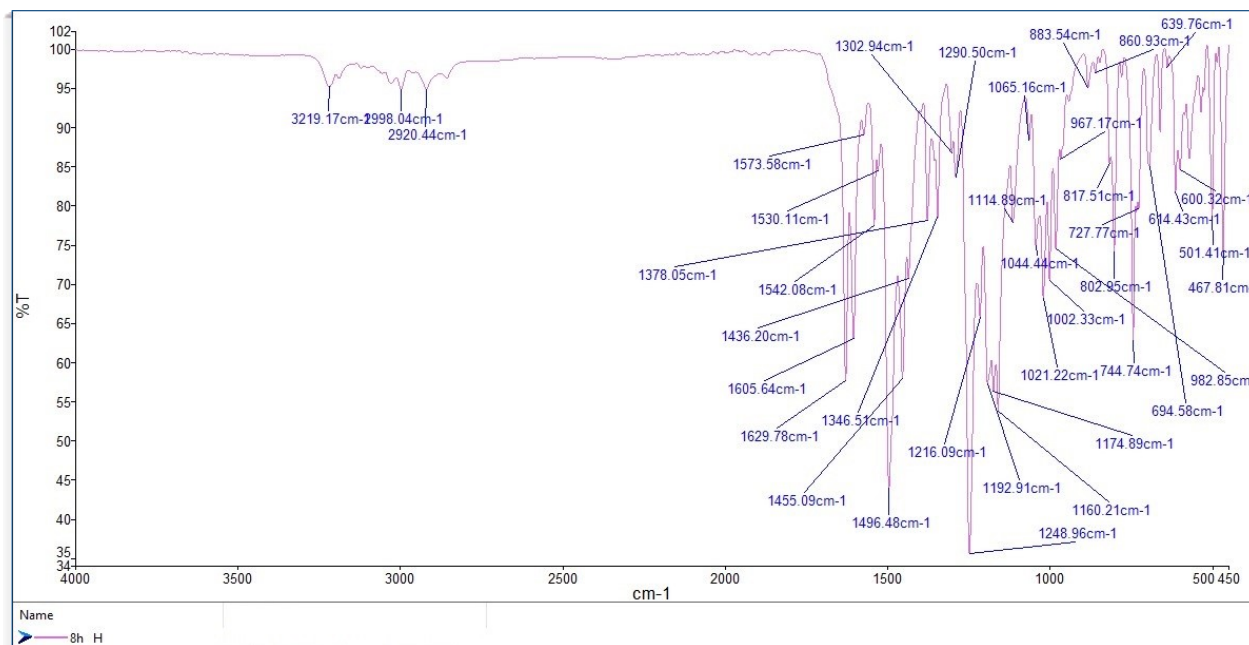

Fig. S23. IR spectrum of **9f**



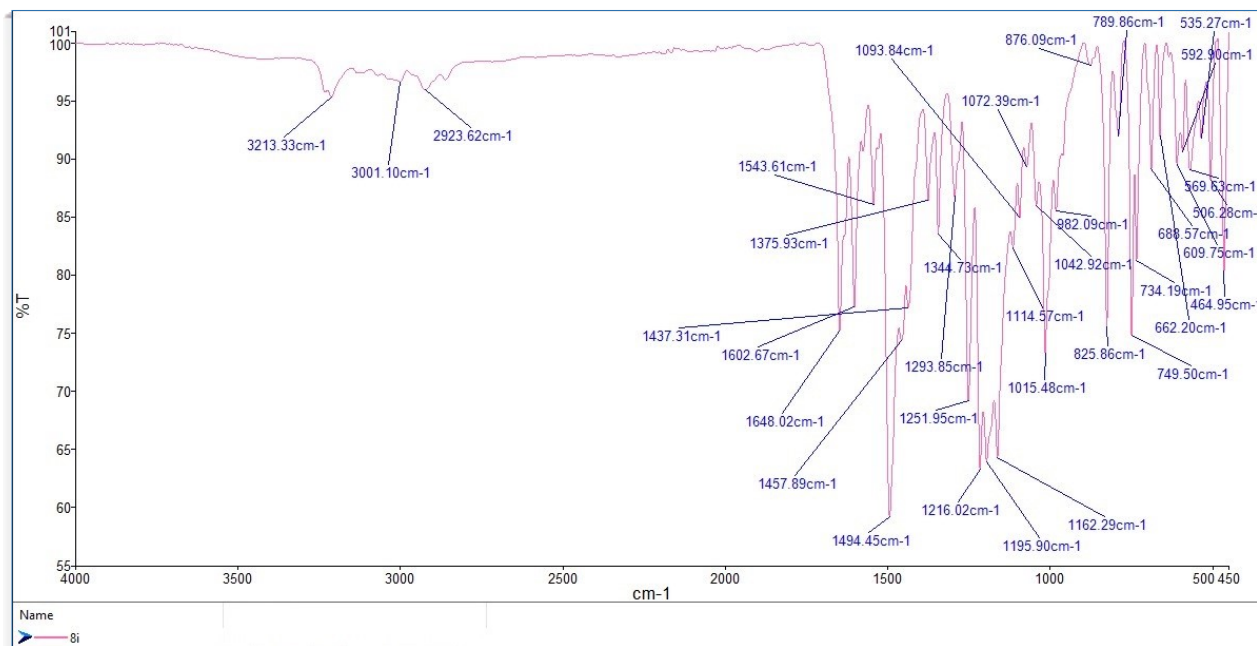

Fig. S26. IR spectrum of 9g

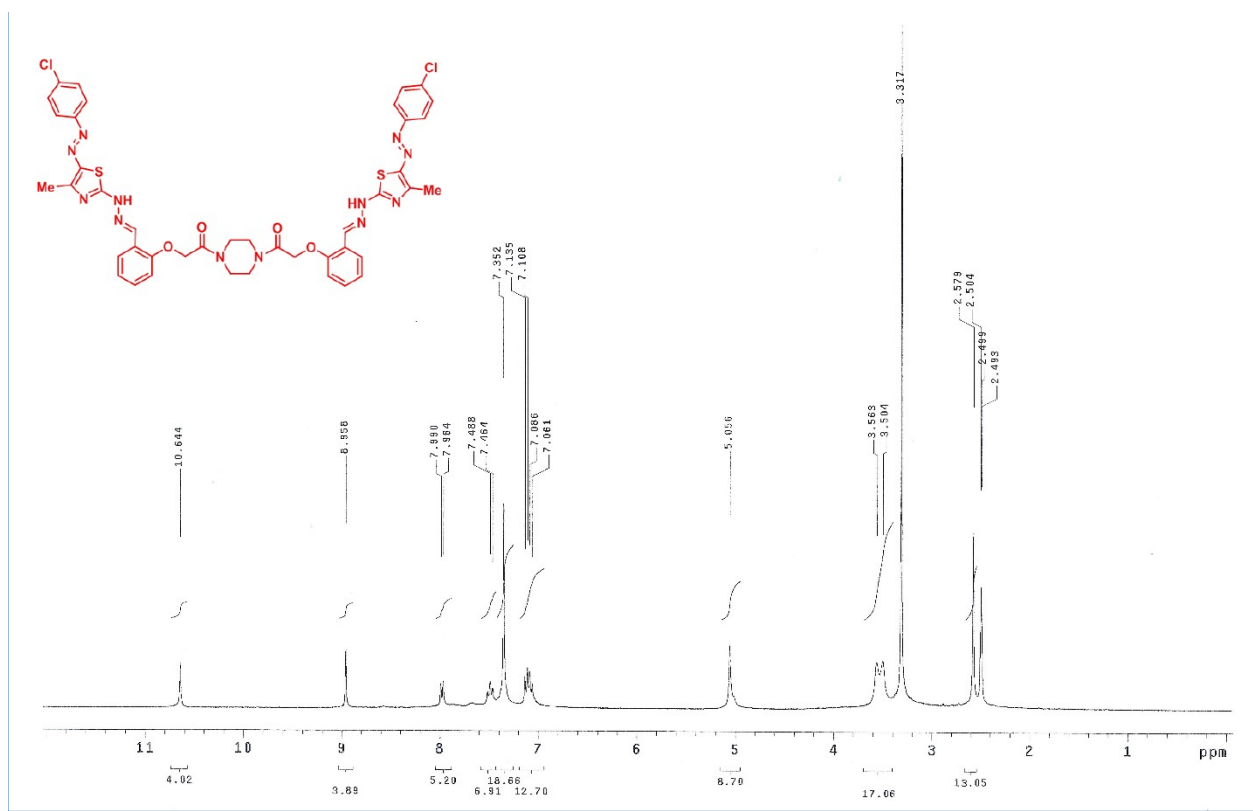

Fig. S27. <sup>1</sup>H NMR spectrum of 9h

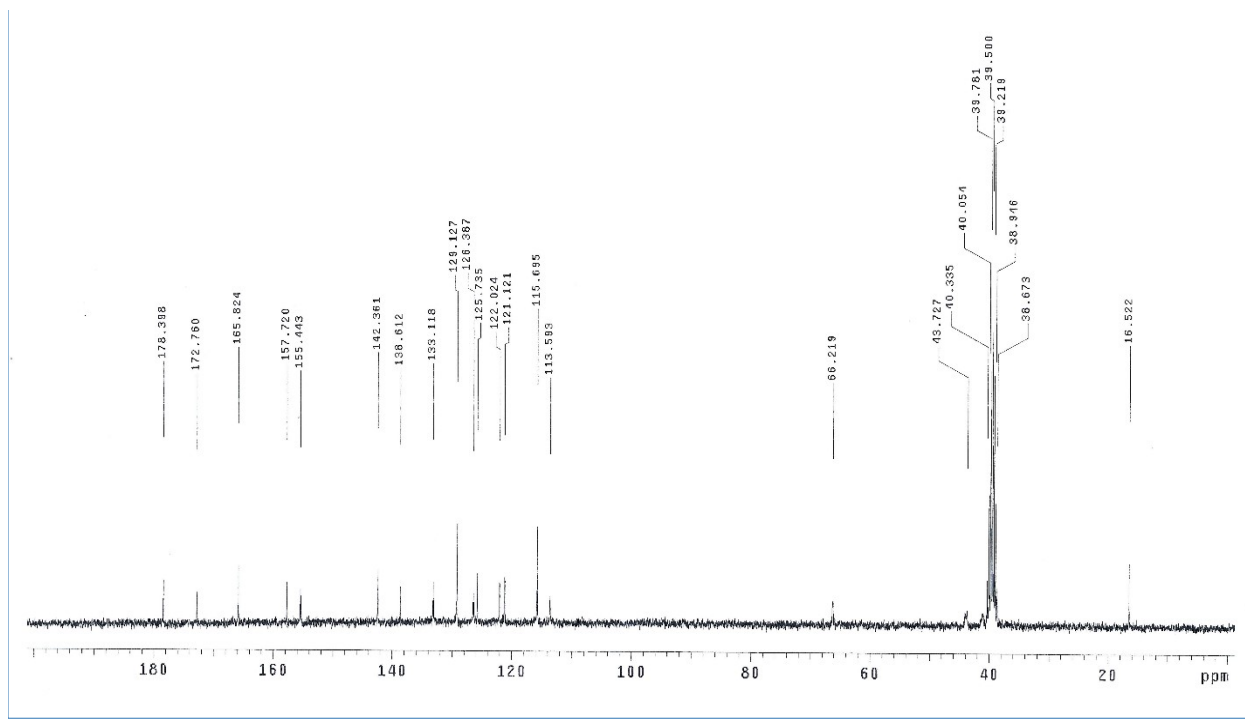

**Fig. S28.**  $^{13}\text{C}$  NMR spectrum of **9h**

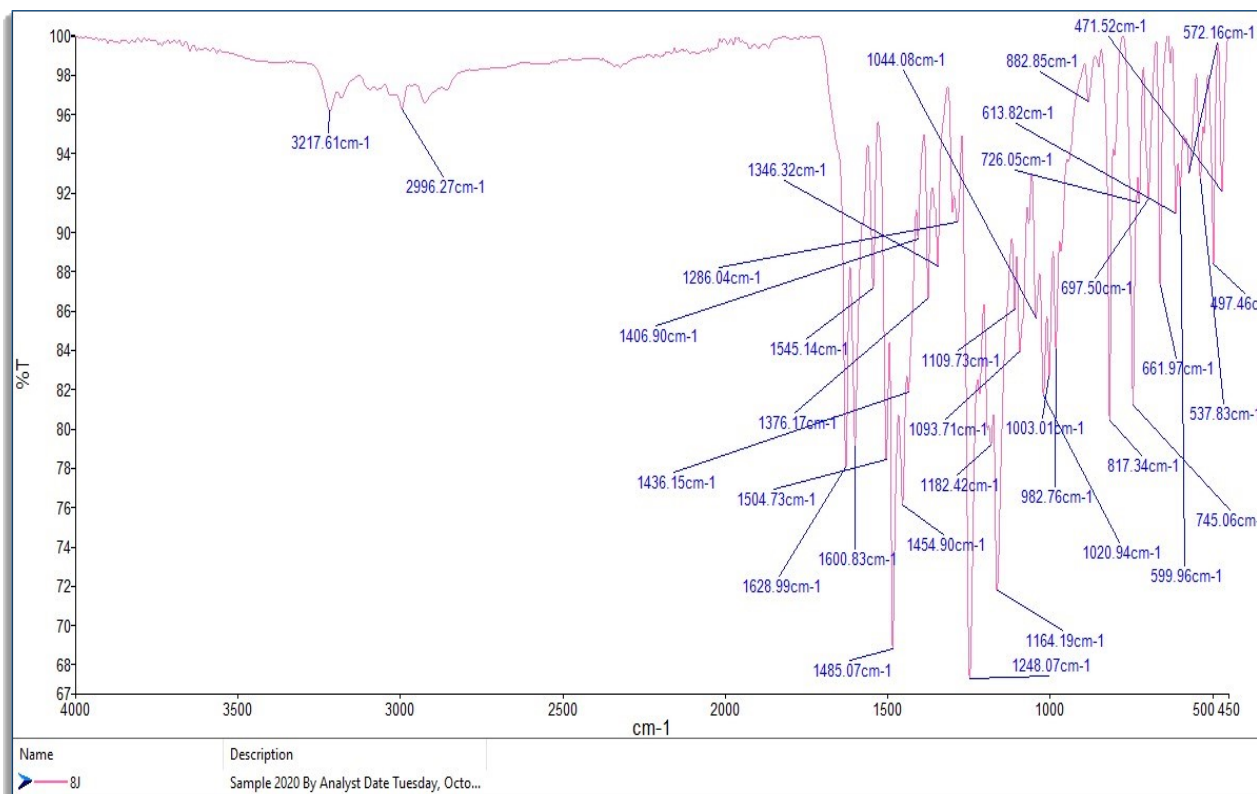

**Fig. S29.** IR spectrum of **9h**



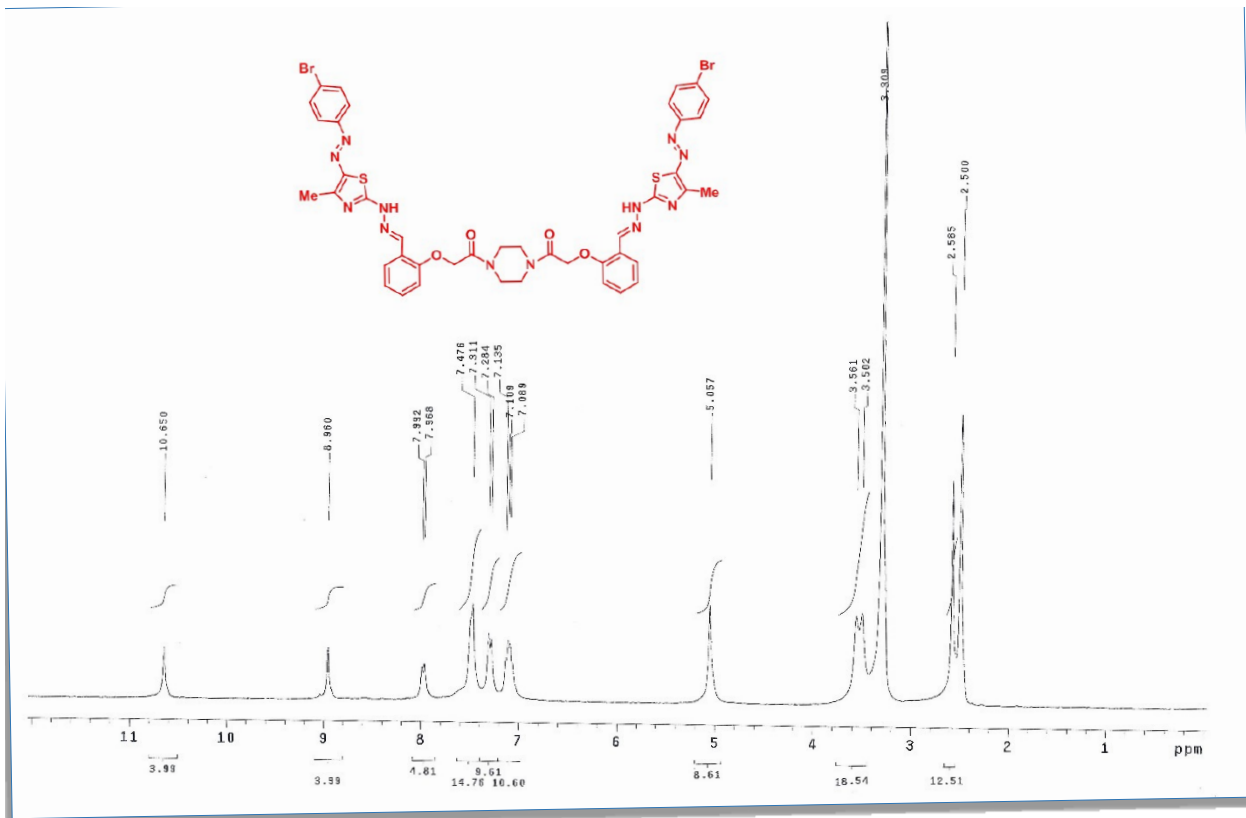

**Fig. S30.** <sup>1</sup>H NMR spectrum of **9i**

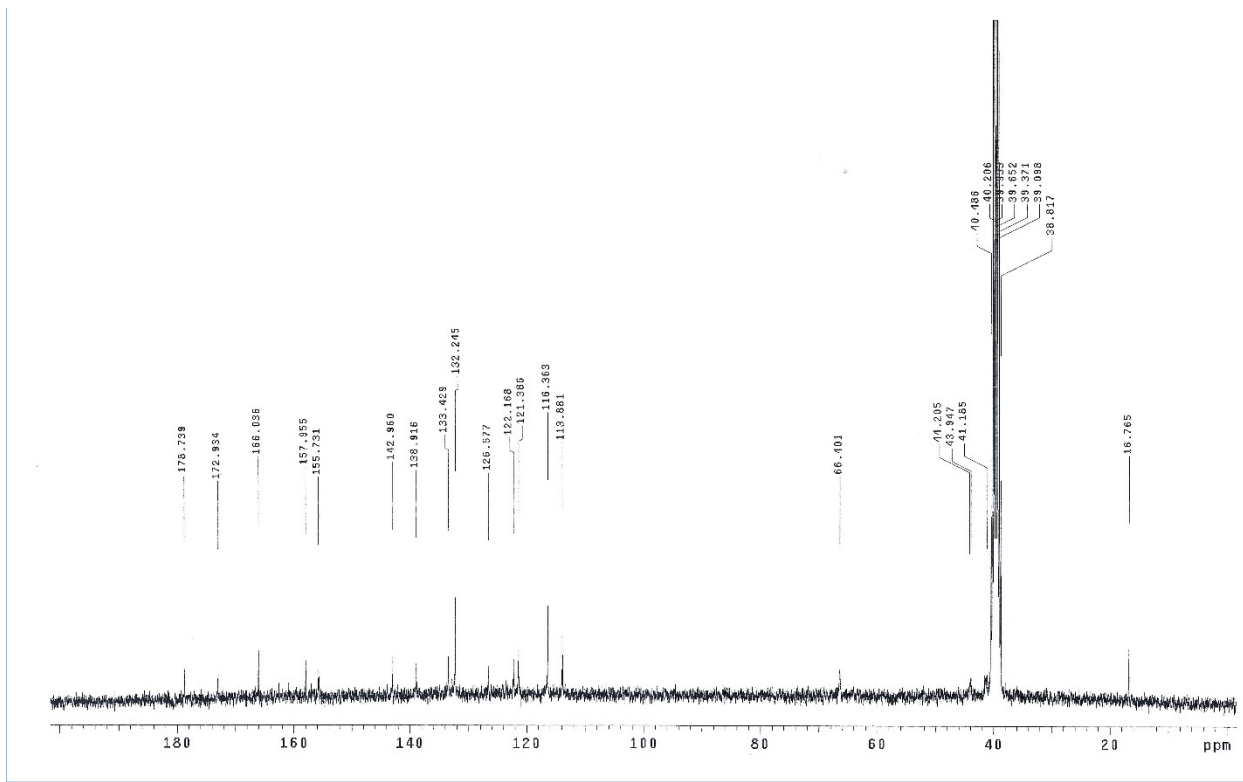

**Fig. S31.** <sup>13</sup>C NMR spectrum of **9i**

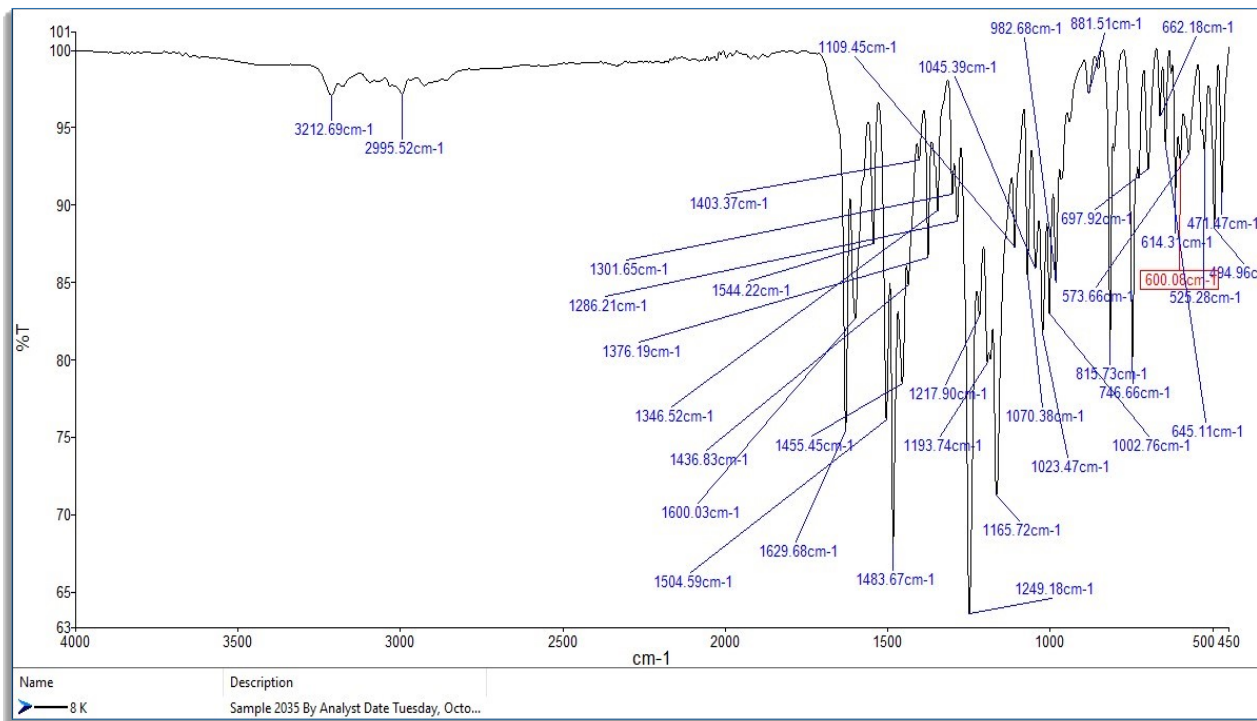

Fig. S32. IR spectrum of 9i

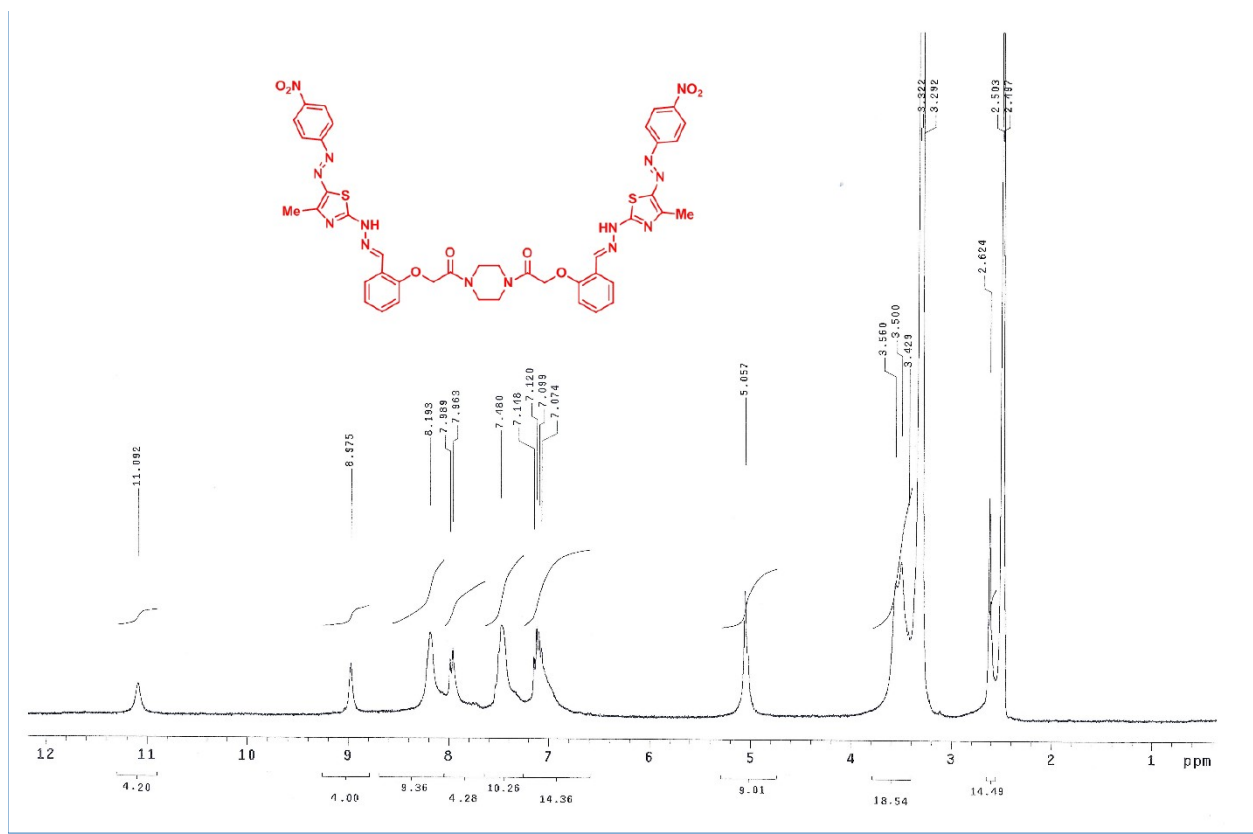

Fig. S33. <sup>1</sup>H NMR spectrum of 9j

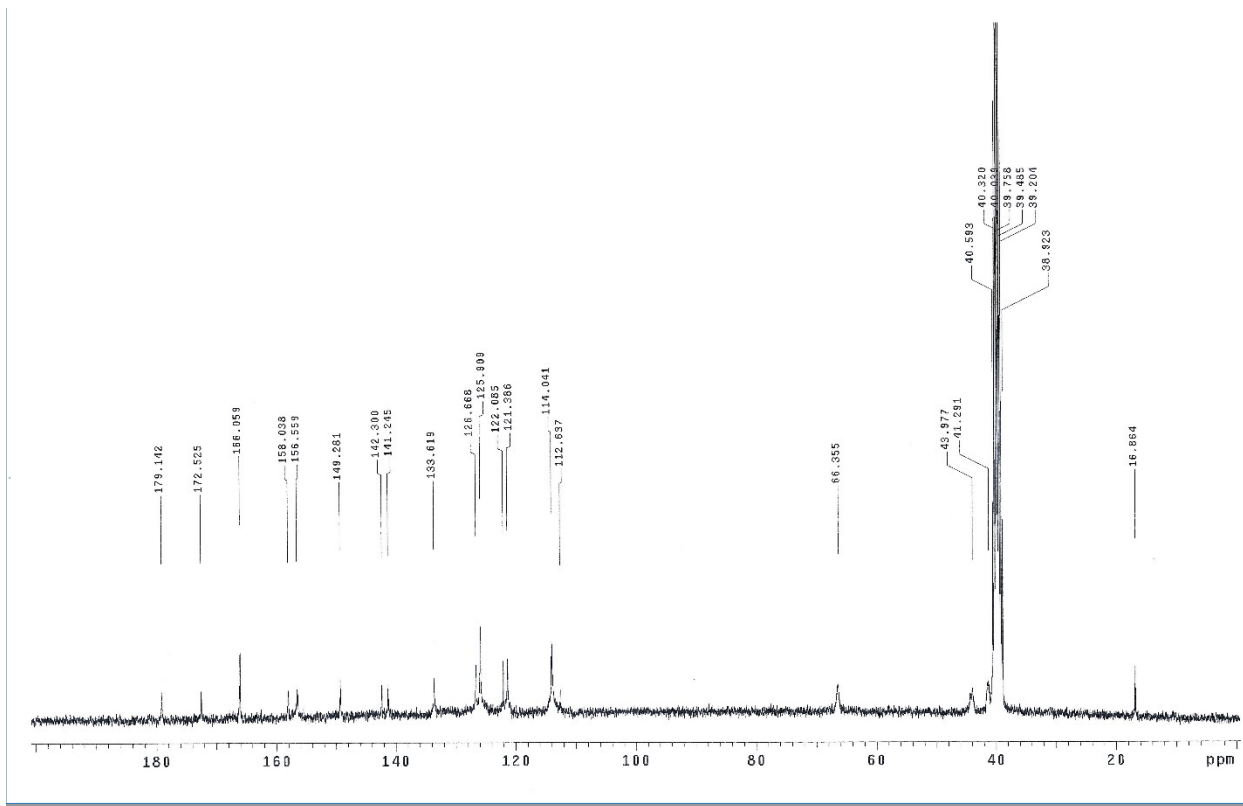

Fig. S34.  $^{13}\text{C}$  NMR spectrum of **9j**

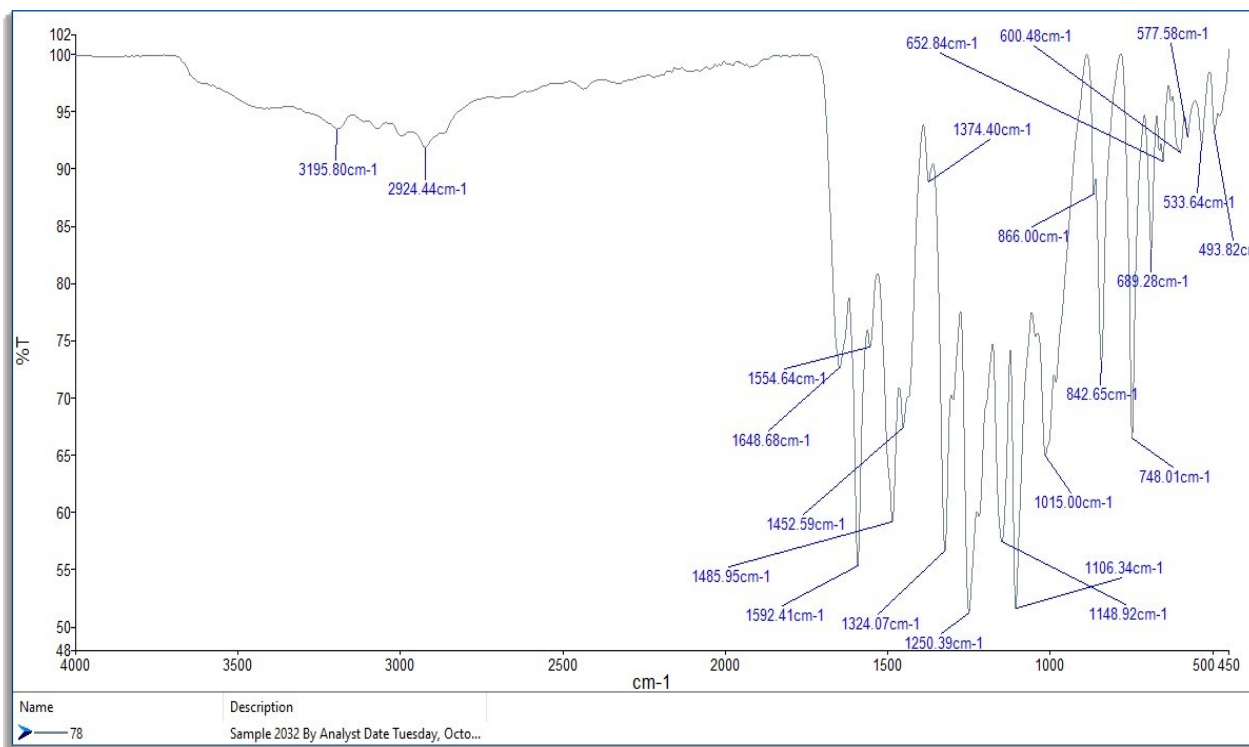

Fig. S35. IR spectrum of **9j**

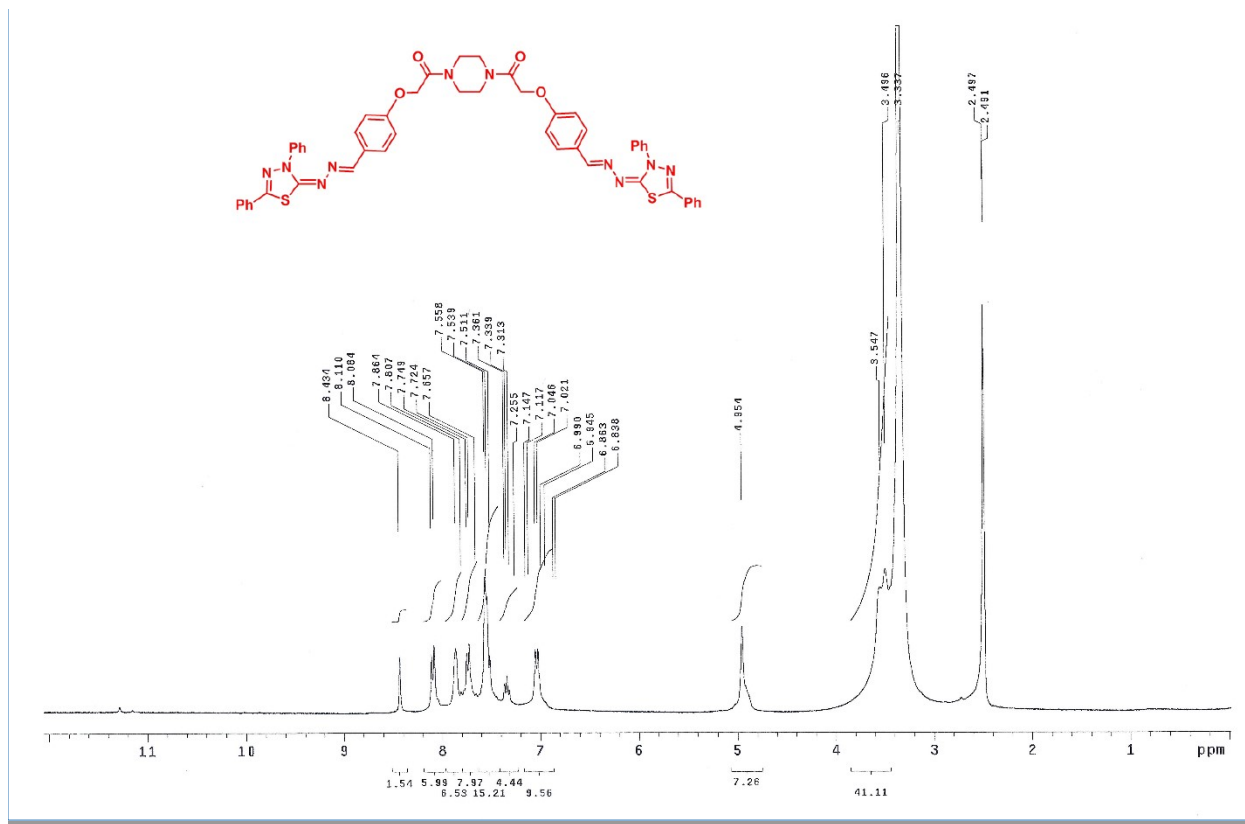

Fig. S36. <sup>1</sup>H NMR spectrum of 13a

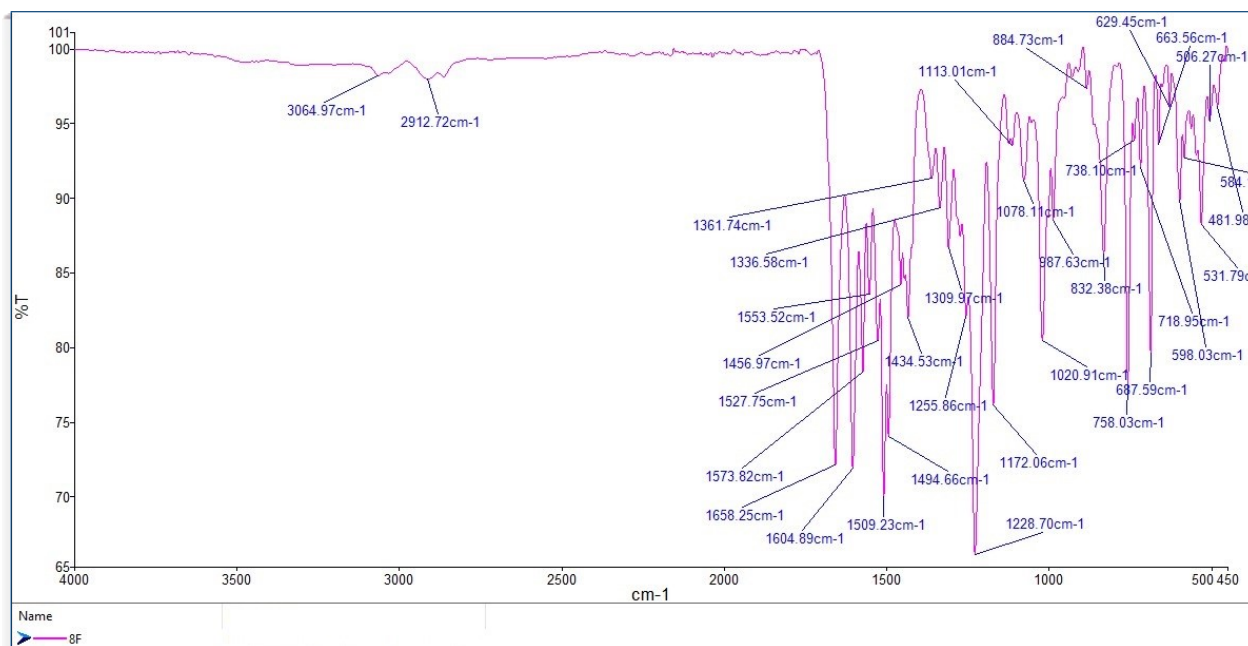

Fig. S37. IR spectrum of 13a

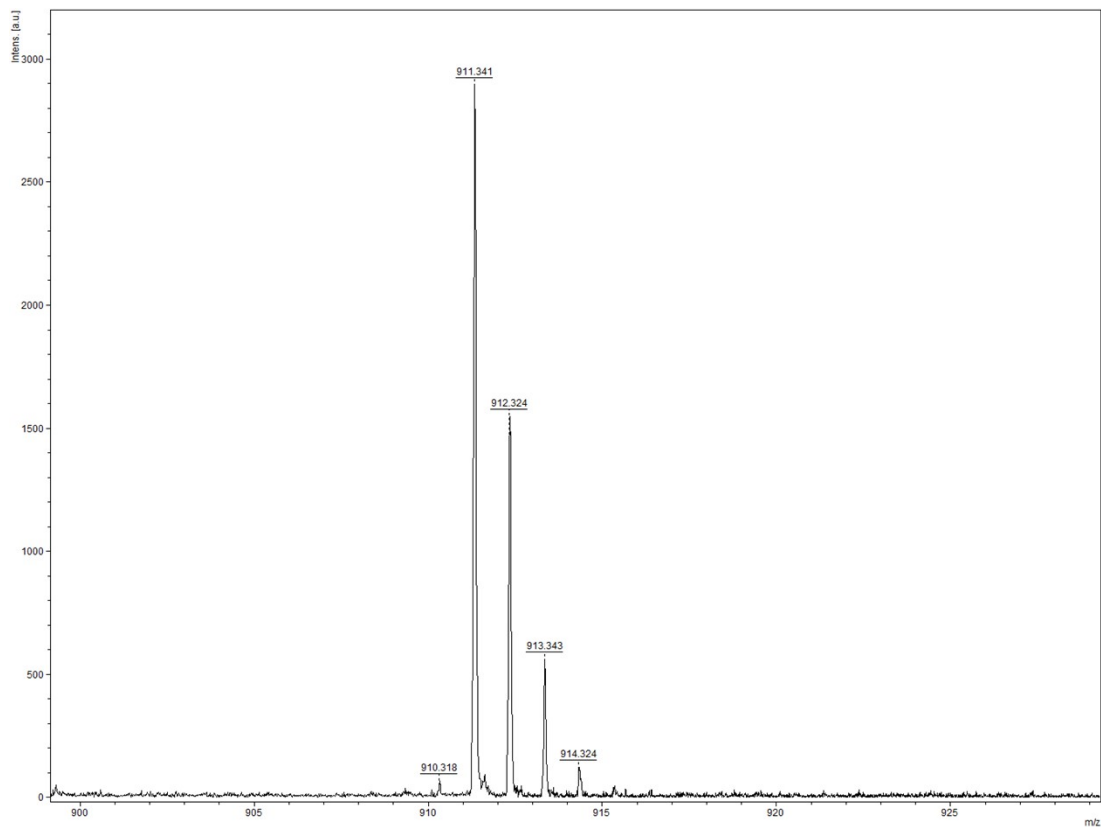

**Fig. S38.** Mass spectrum of **13a**

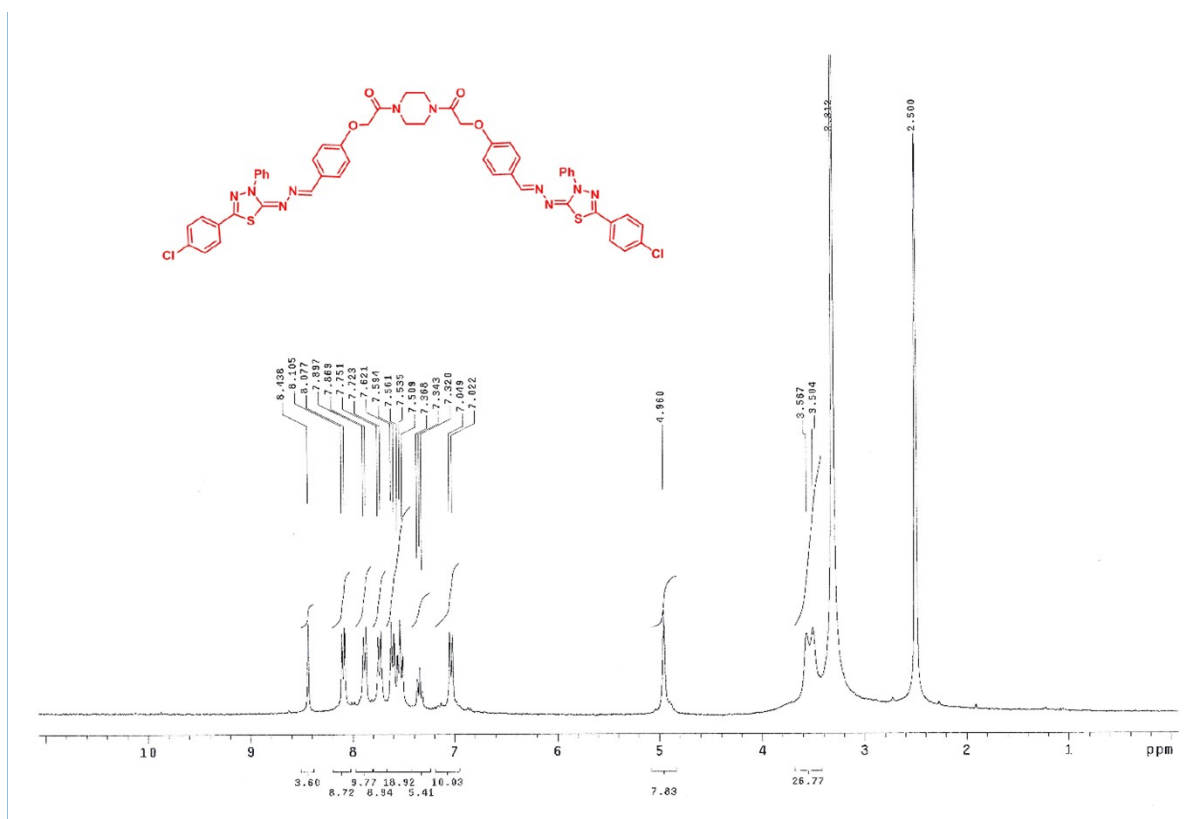

**Fig. S39.** <sup>1</sup>H NMR spectrum of **13b**

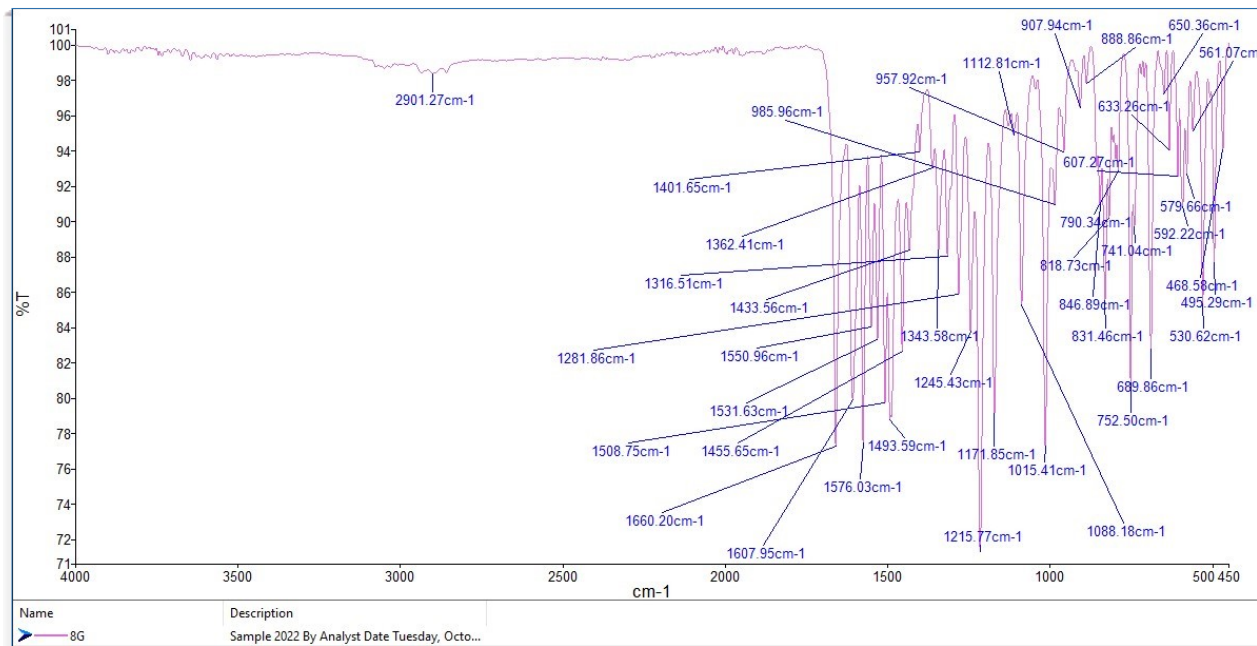

**Fig. S40.** IR spectrum of **13b**

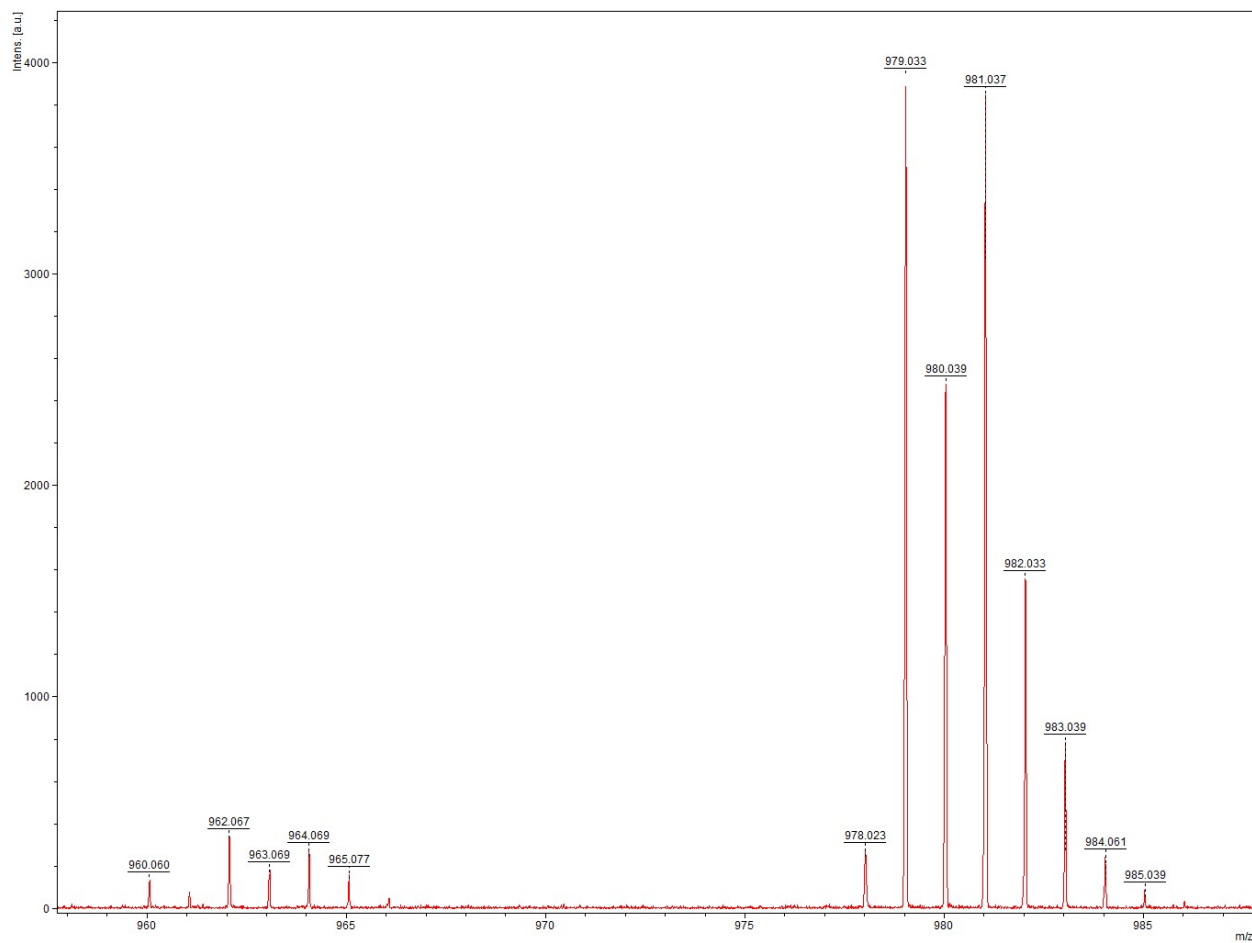

**Fig. S41.** Mass spectrum of **13b**

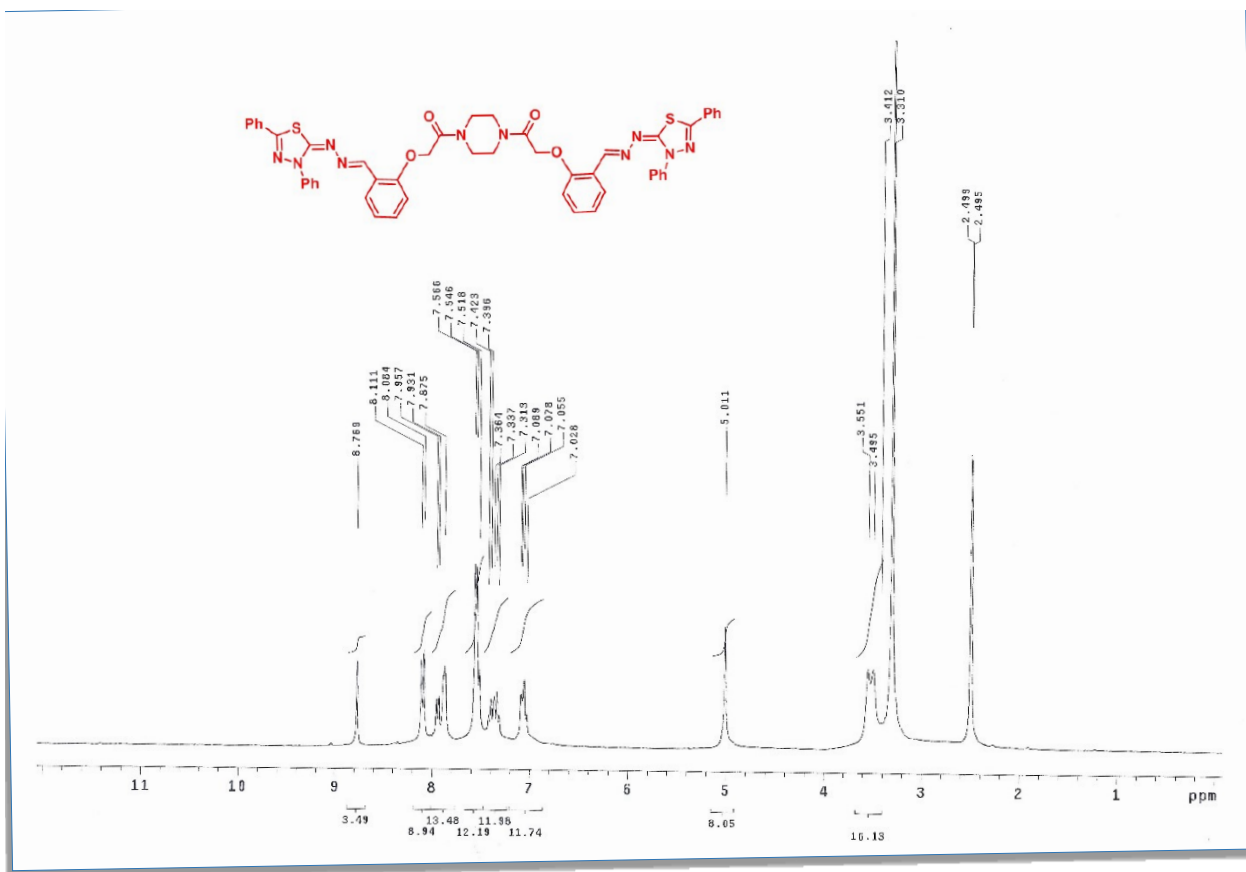

Fig. S42. <sup>1</sup>H NMR spectrum of 13c

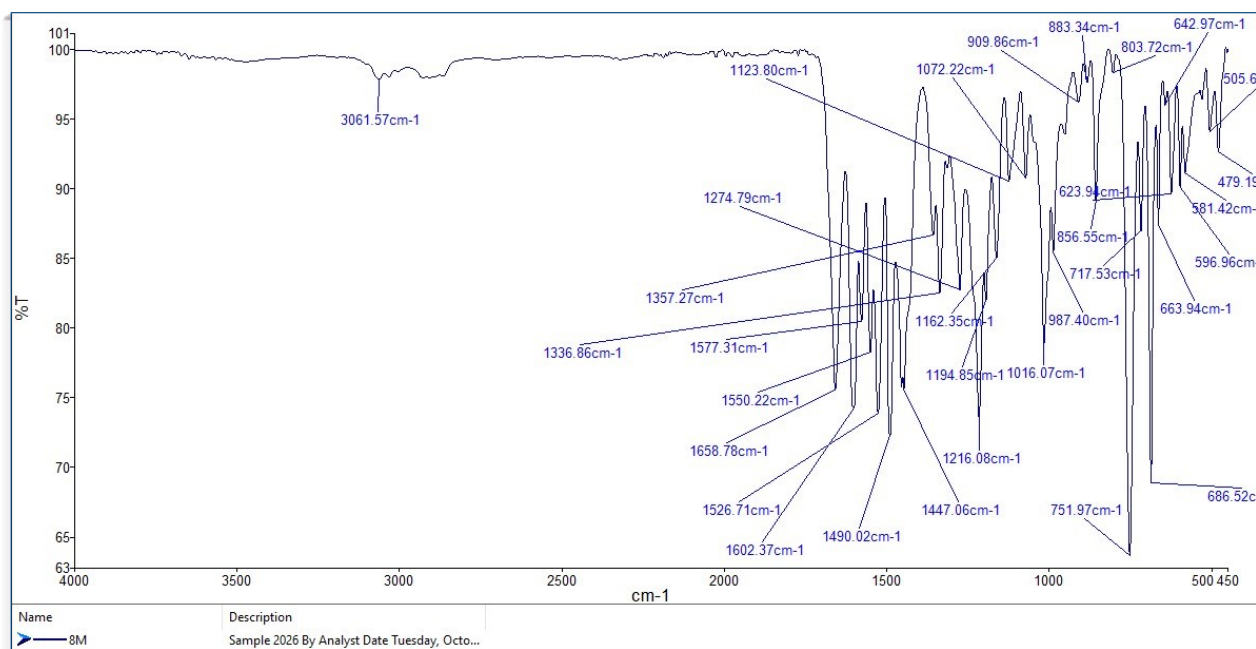

Fig. S43. IR spectrum of 13c

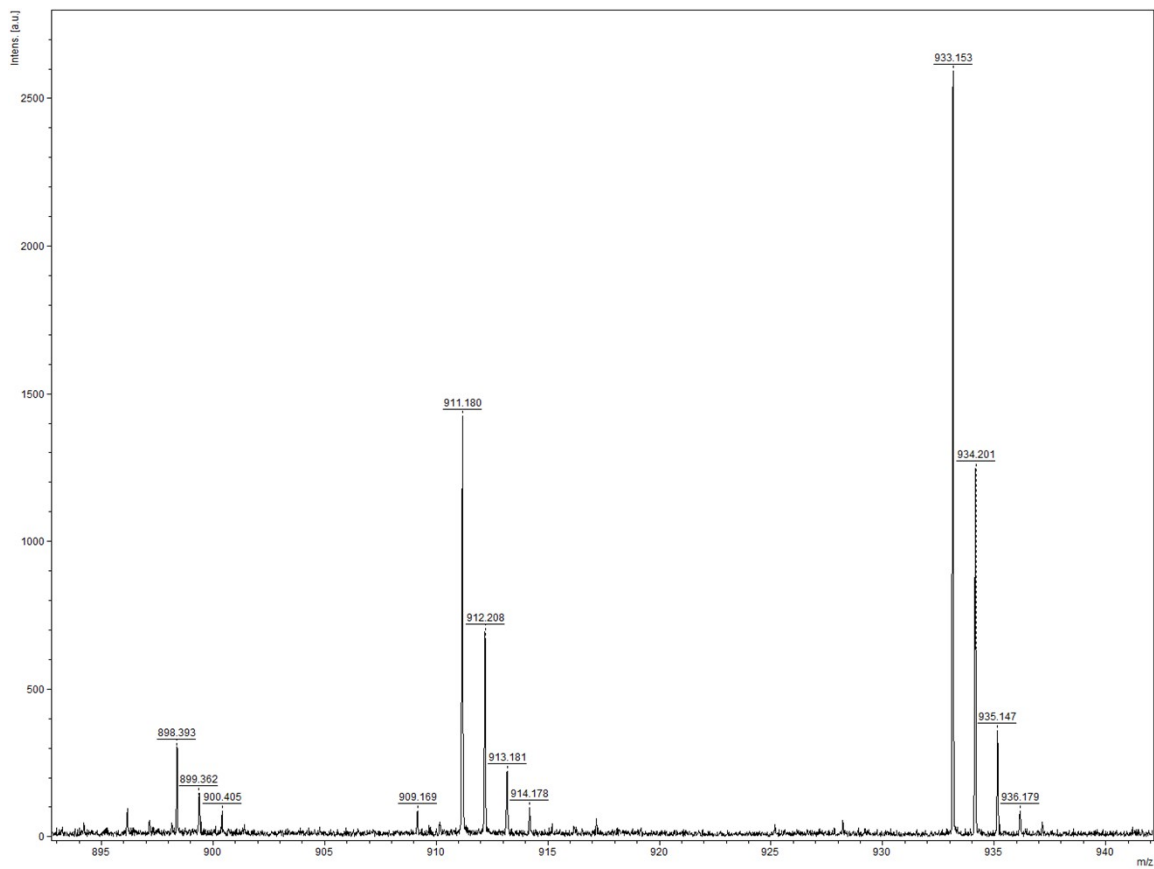

Fig. S44. Mass spectrum of 13c

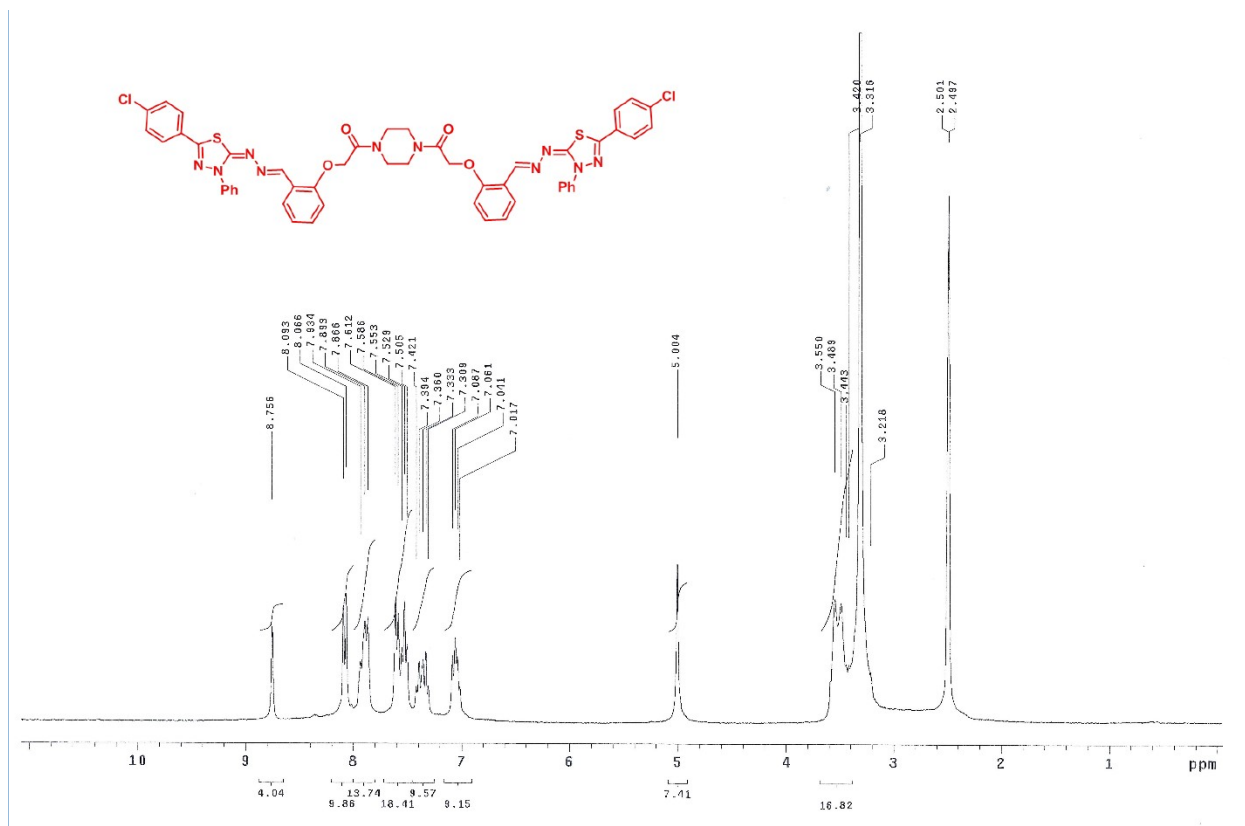

Fig. S45. <sup>1</sup>H NMR spectrum of 13d



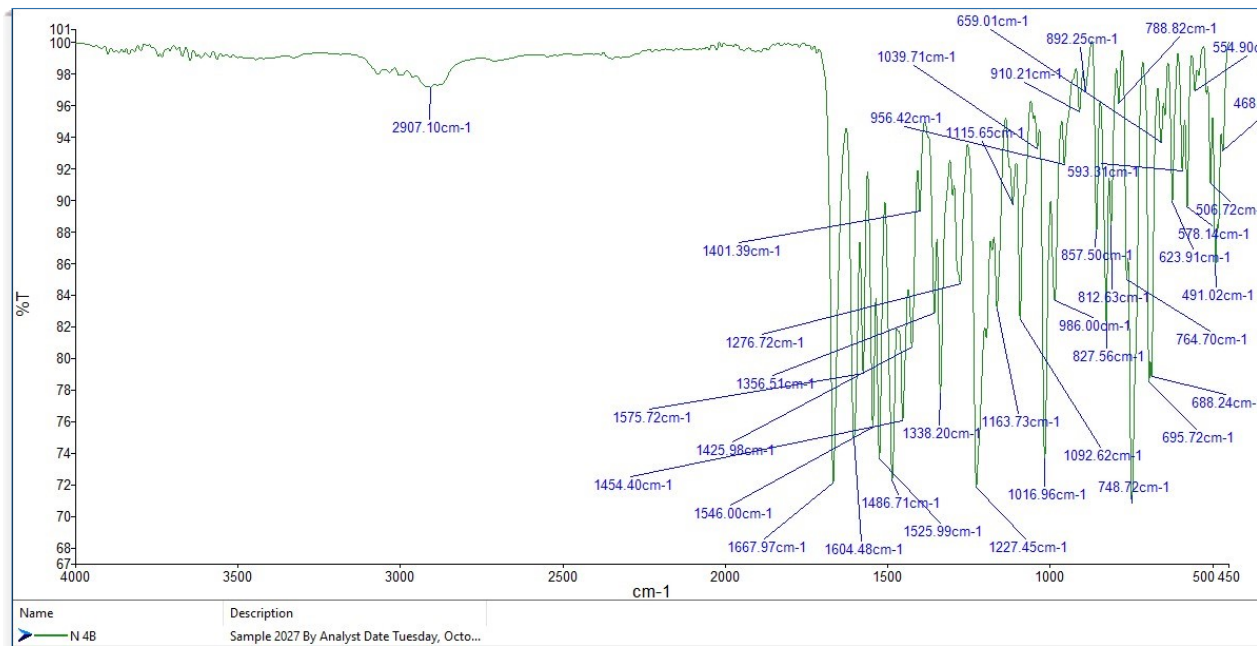

Fig. S46. IR spectrum of 13d

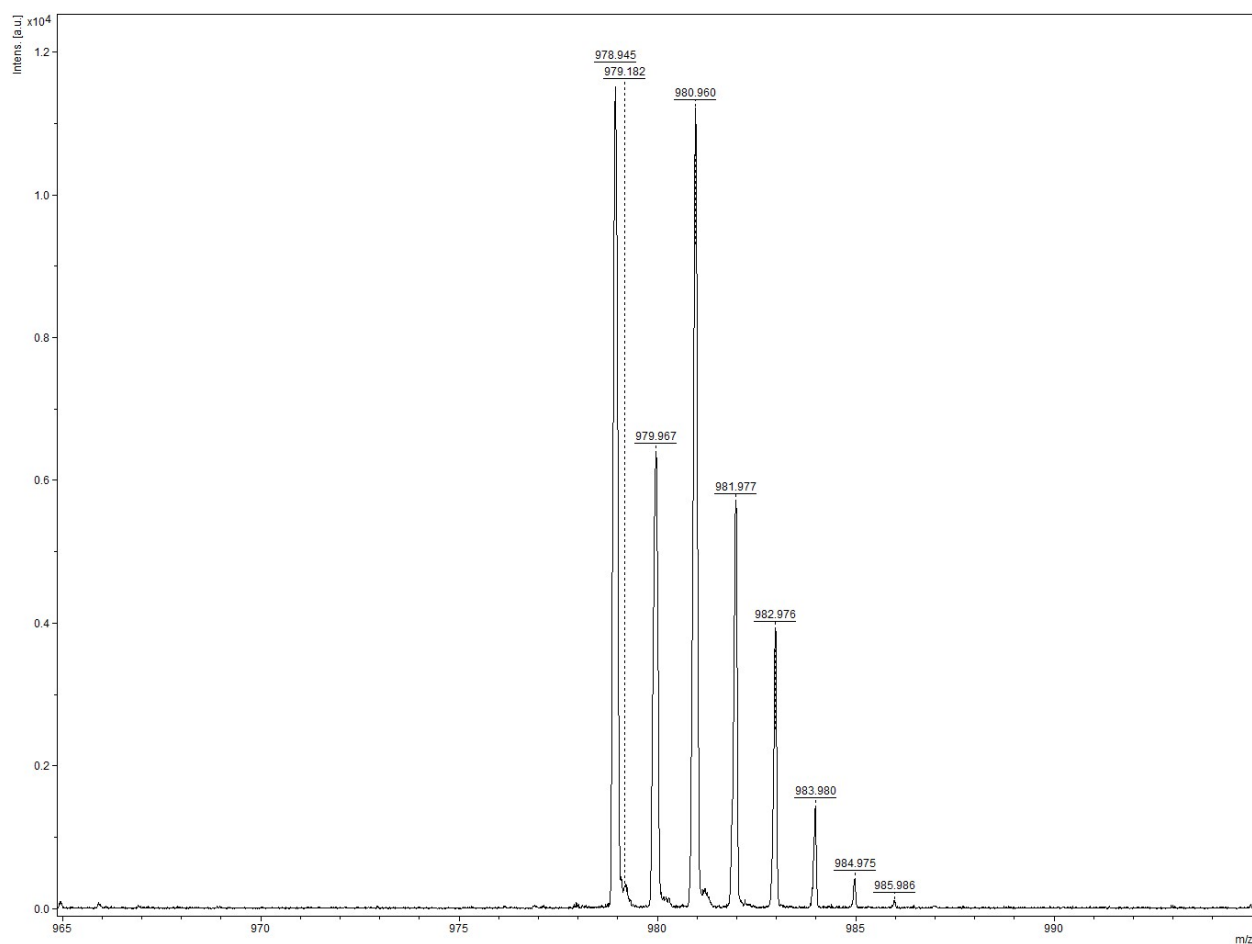

Fig. S47. Mass spectrum of 13d

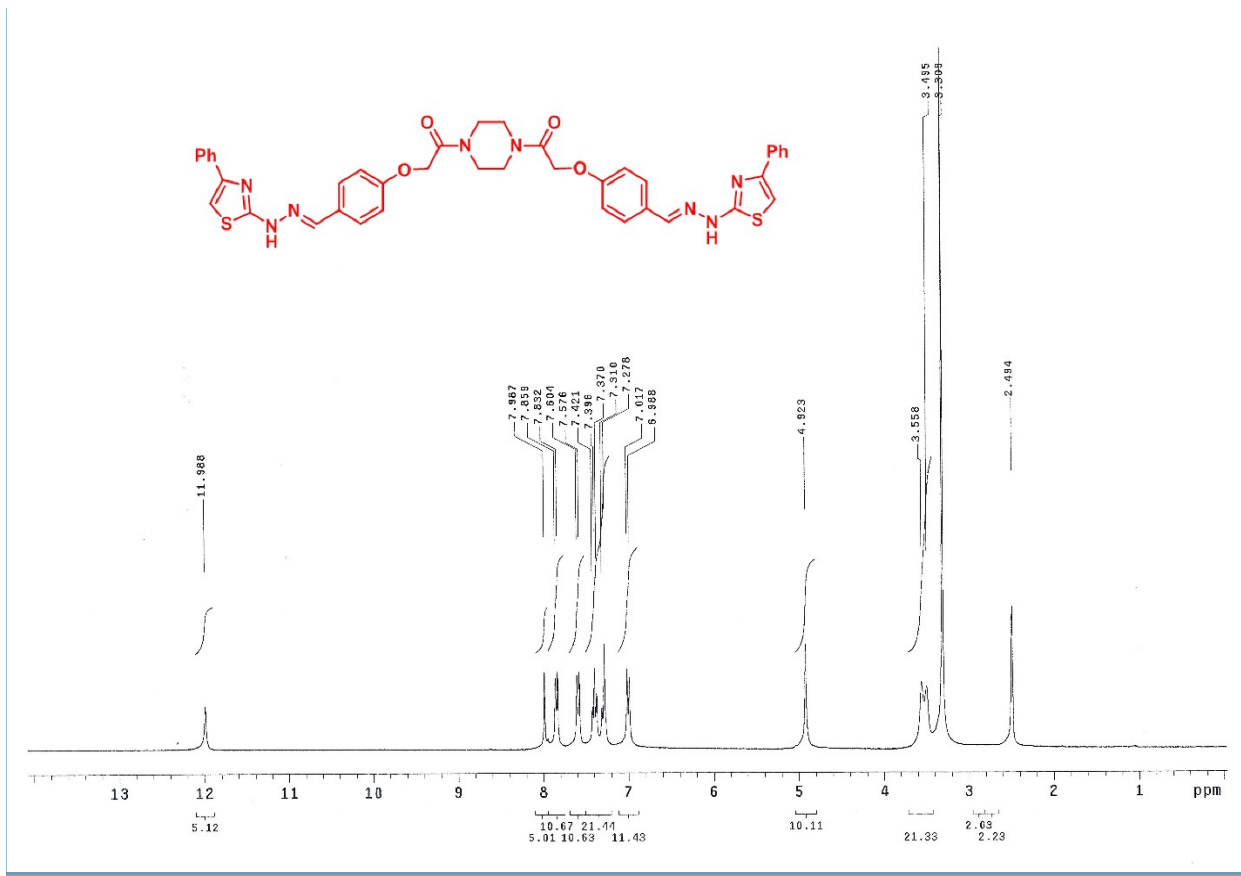

Fig. S48. <sup>1</sup>H NMR spectrum of 15a

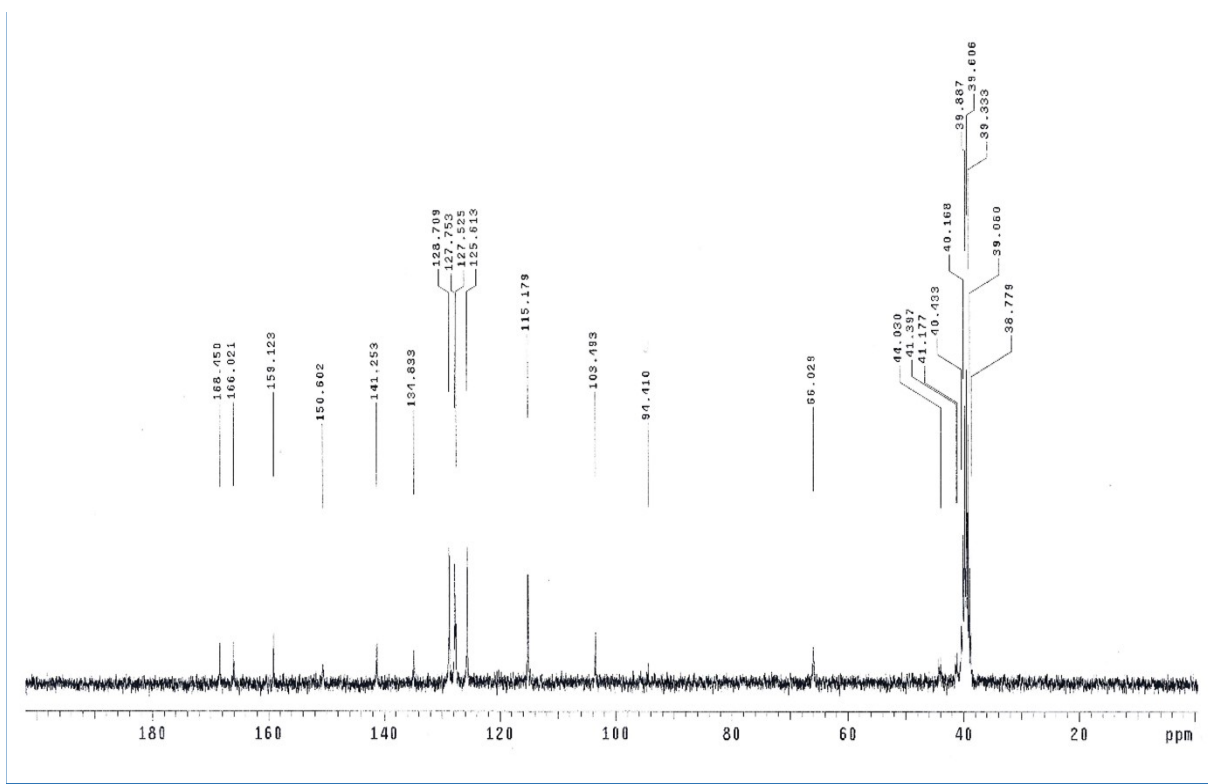

Fig. S49. <sup>13</sup>C NMR spectrum of 15a

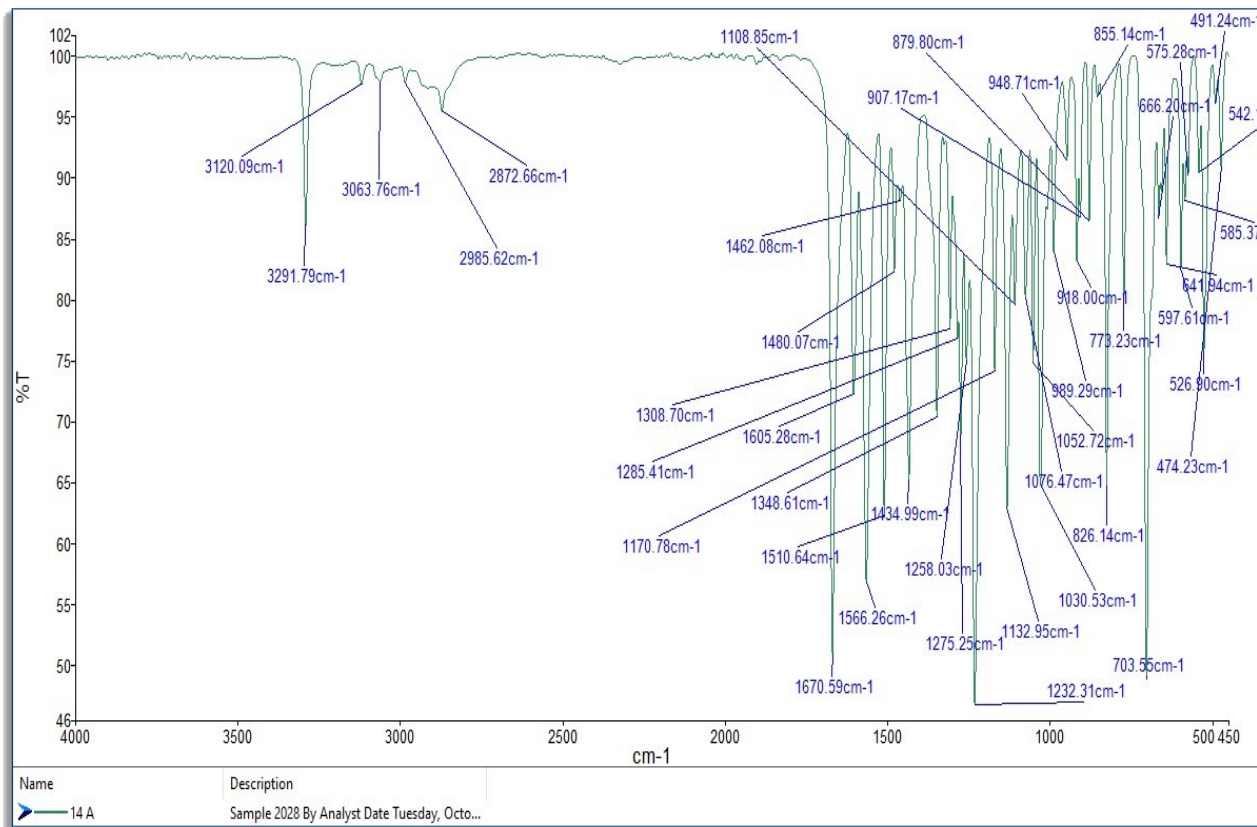

**Fig. S50.** IR spectrum of **15a**

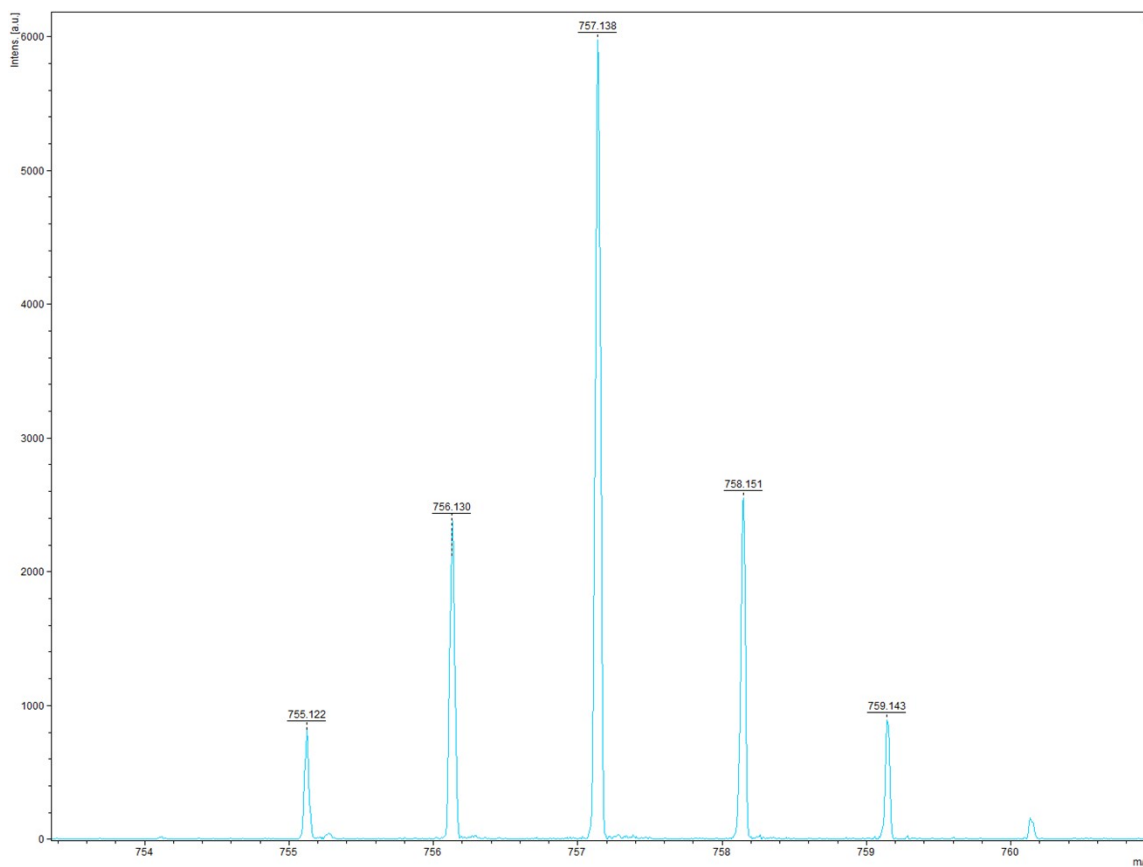

**Fig. S51.** Mass spectrum of **15a**

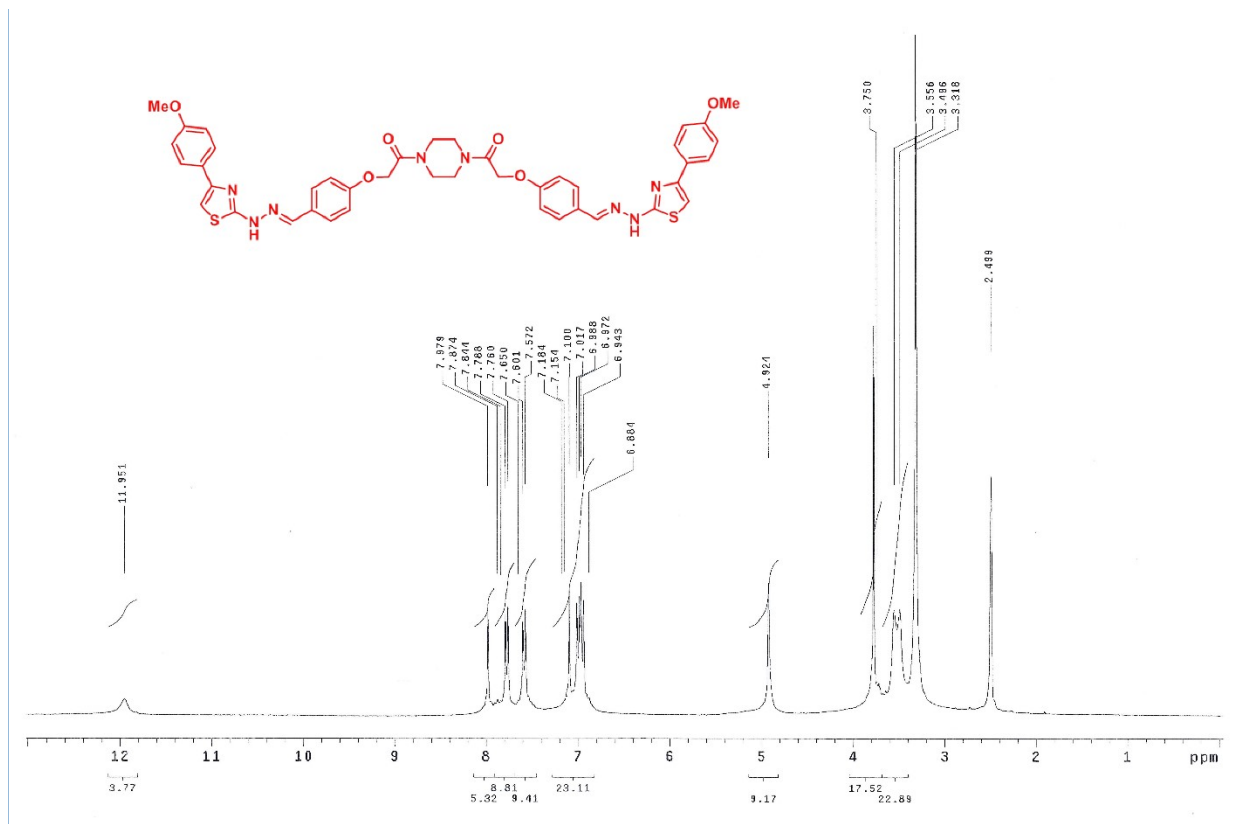

Fig. S52. <sup>1</sup>H NMR spectrum of **15b**

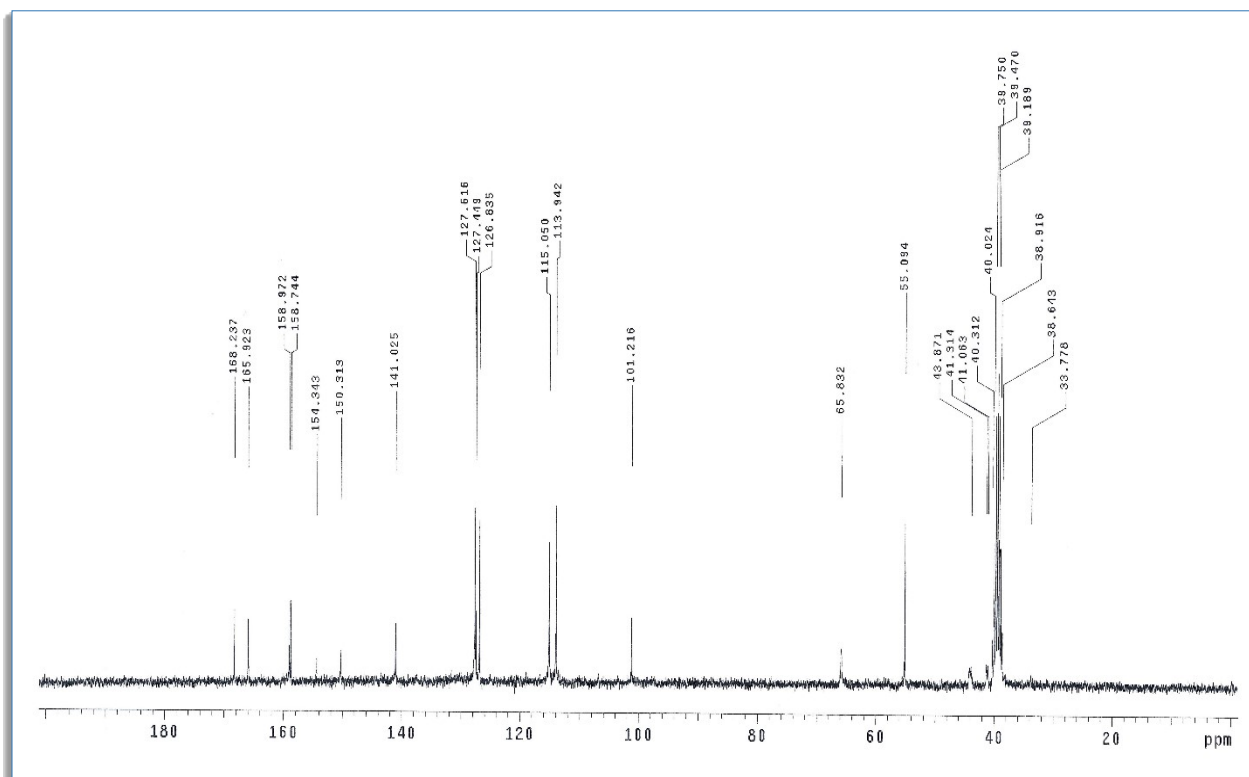

Fig. S53. <sup>13</sup>C NMR spectrum of **15b**

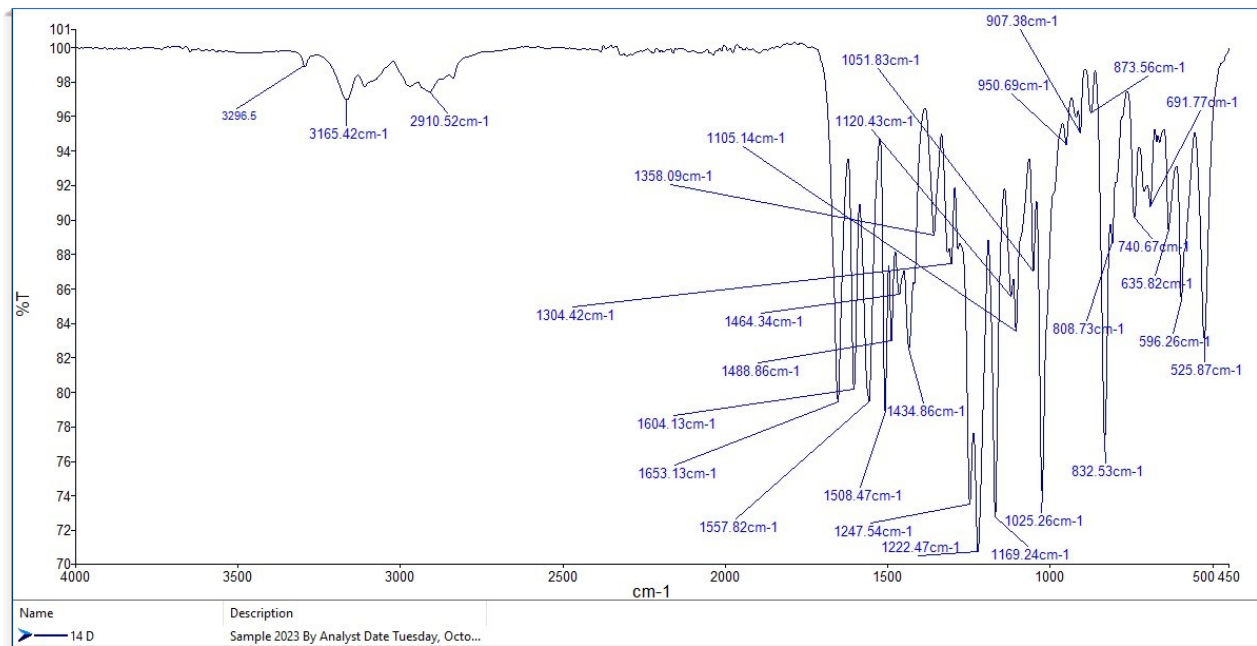

**Fig. S54.** IR spectrum of **15b**

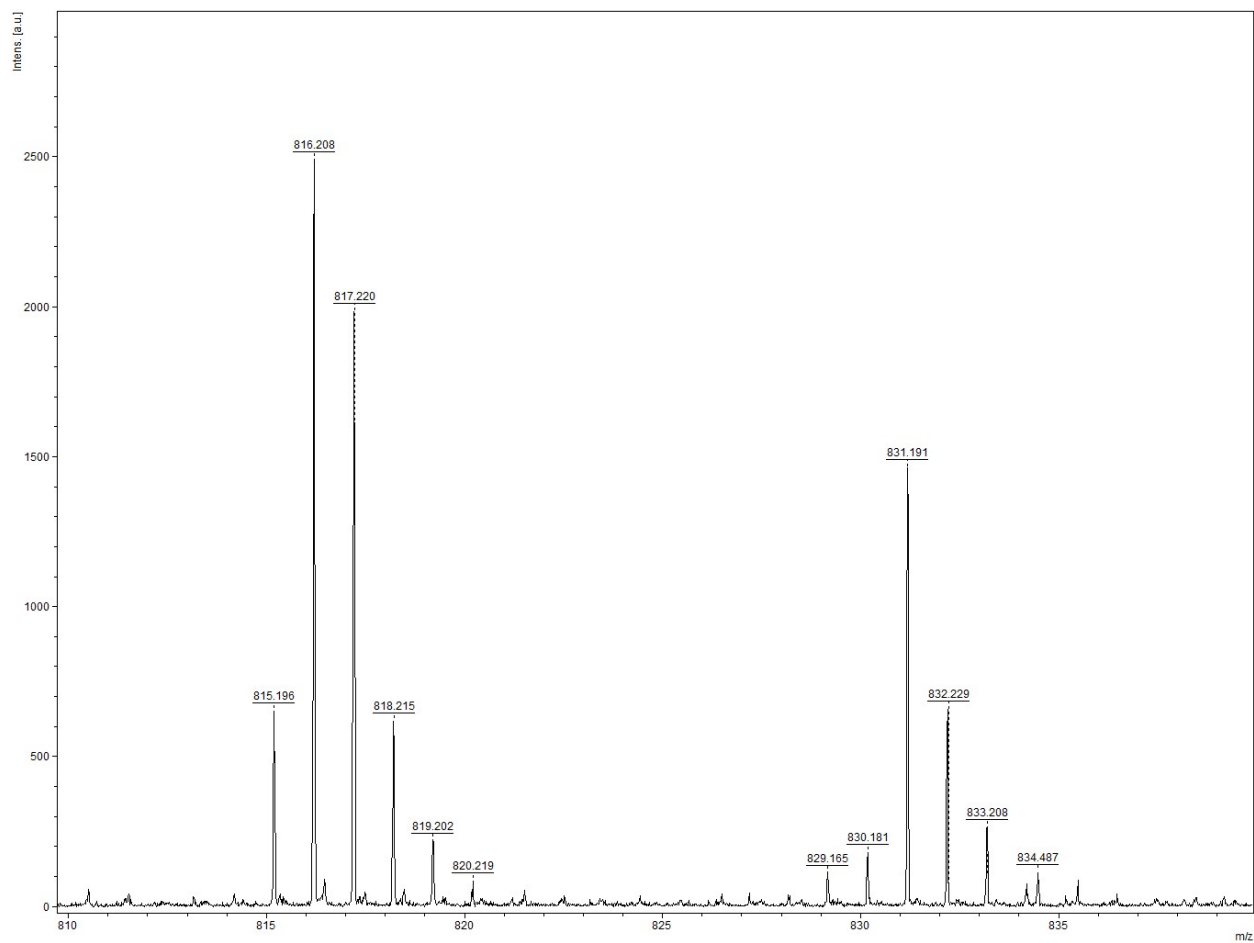

**Fig. S55.** Mass spectrum of **15b**

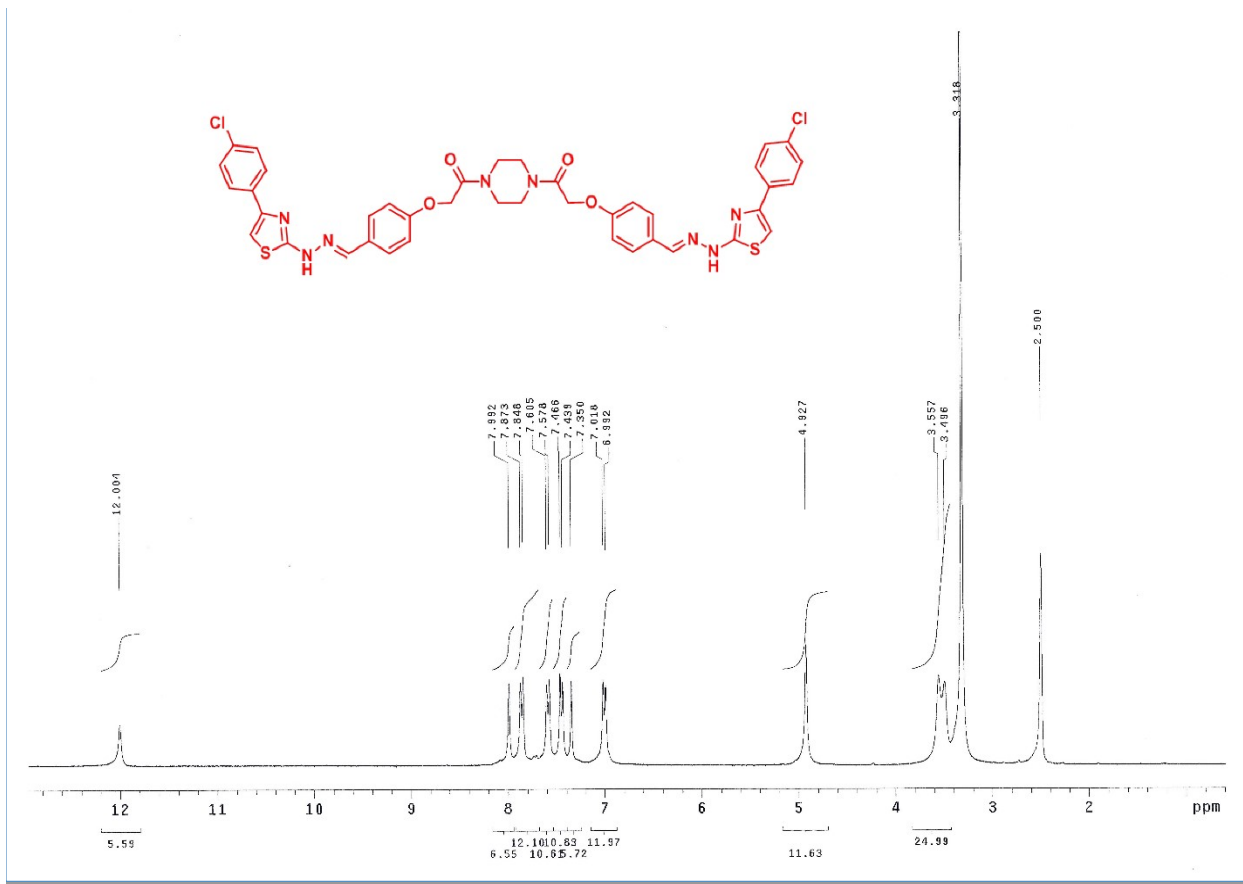

Fig. S56. <sup>1</sup>H NMR spectrum of 15c

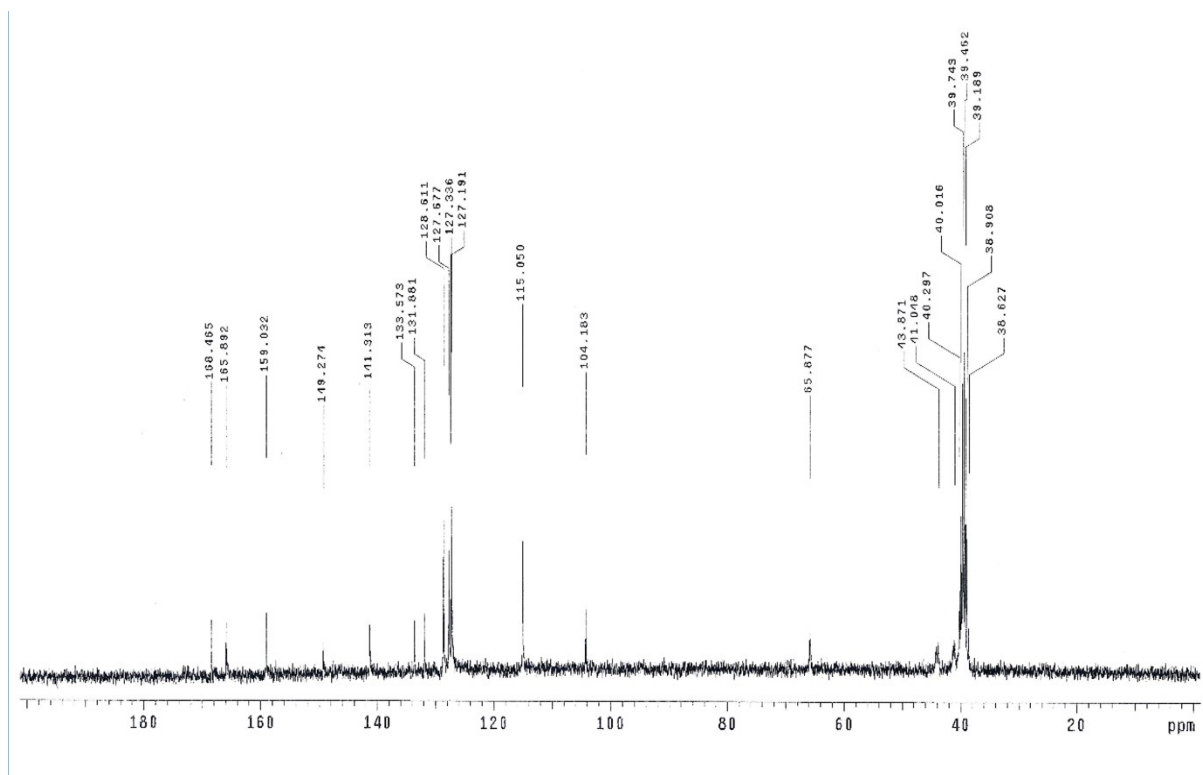

Fig. S57. <sup>13</sup>C NMR spectrum of 15c

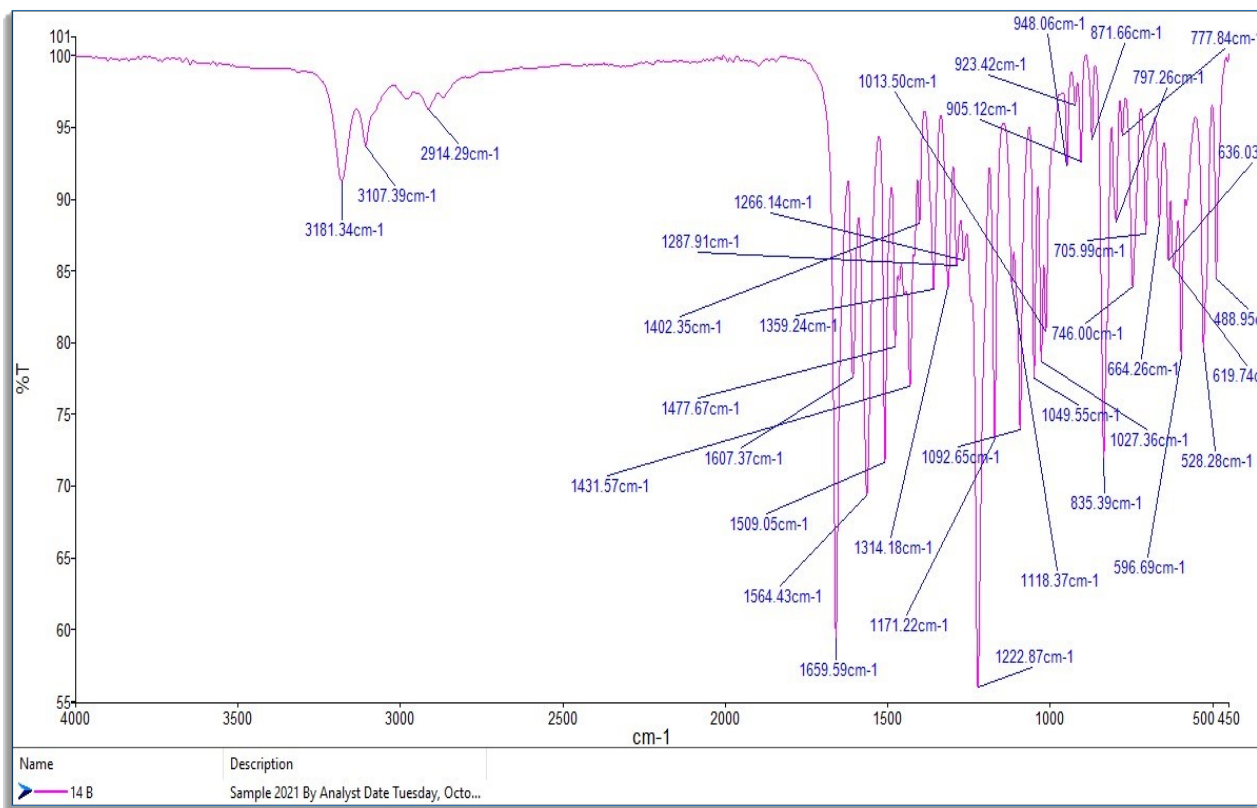

**Fig. S58.** IR spectrum of **15c**

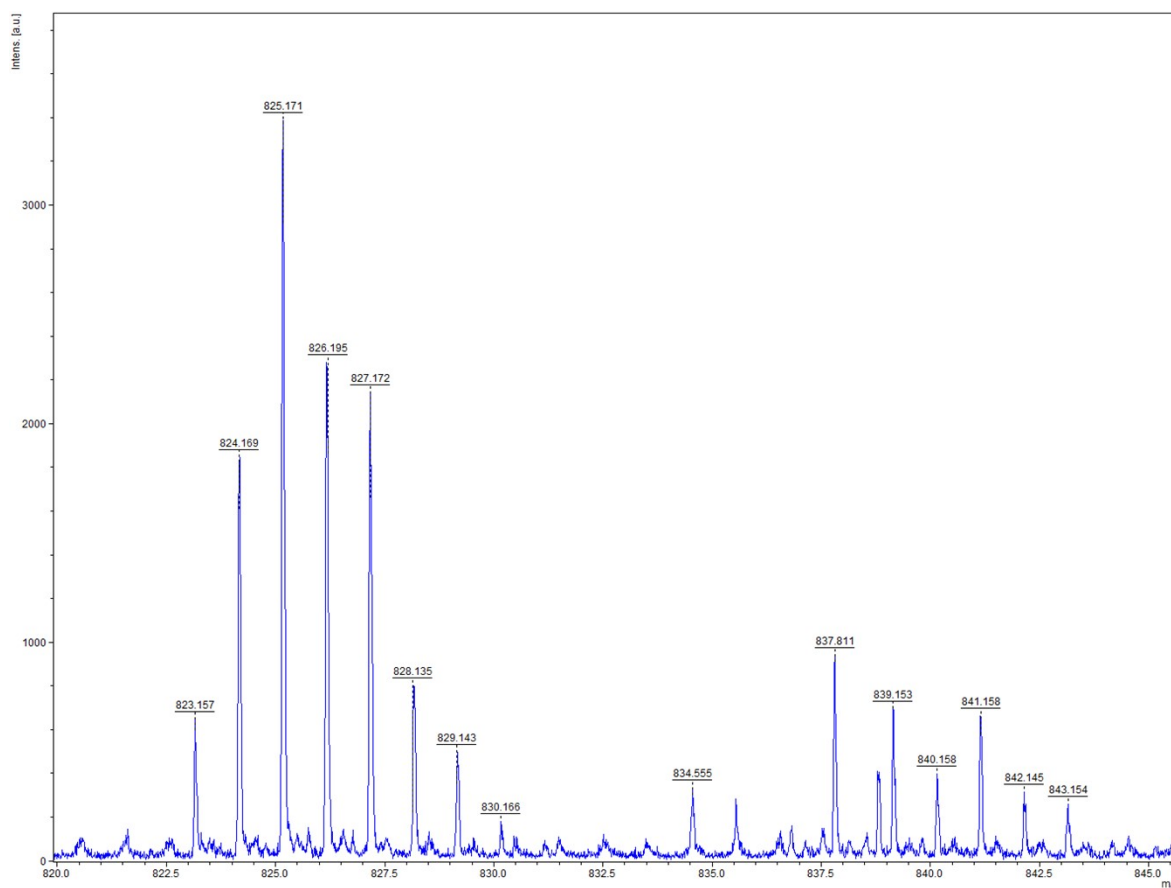

**Fig. S59.** Mass spectrum of **15c**

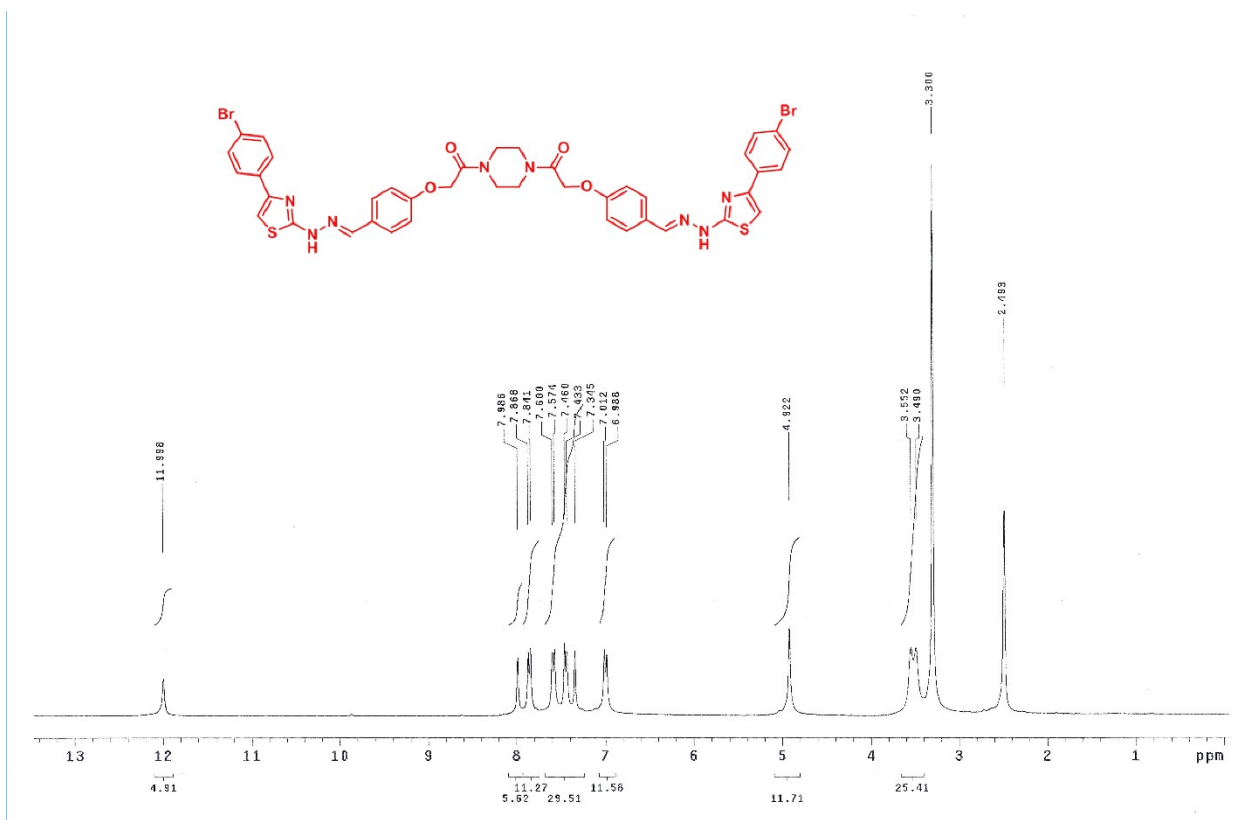

Fig. S60. <sup>1</sup>H NMR spectrum of 15d

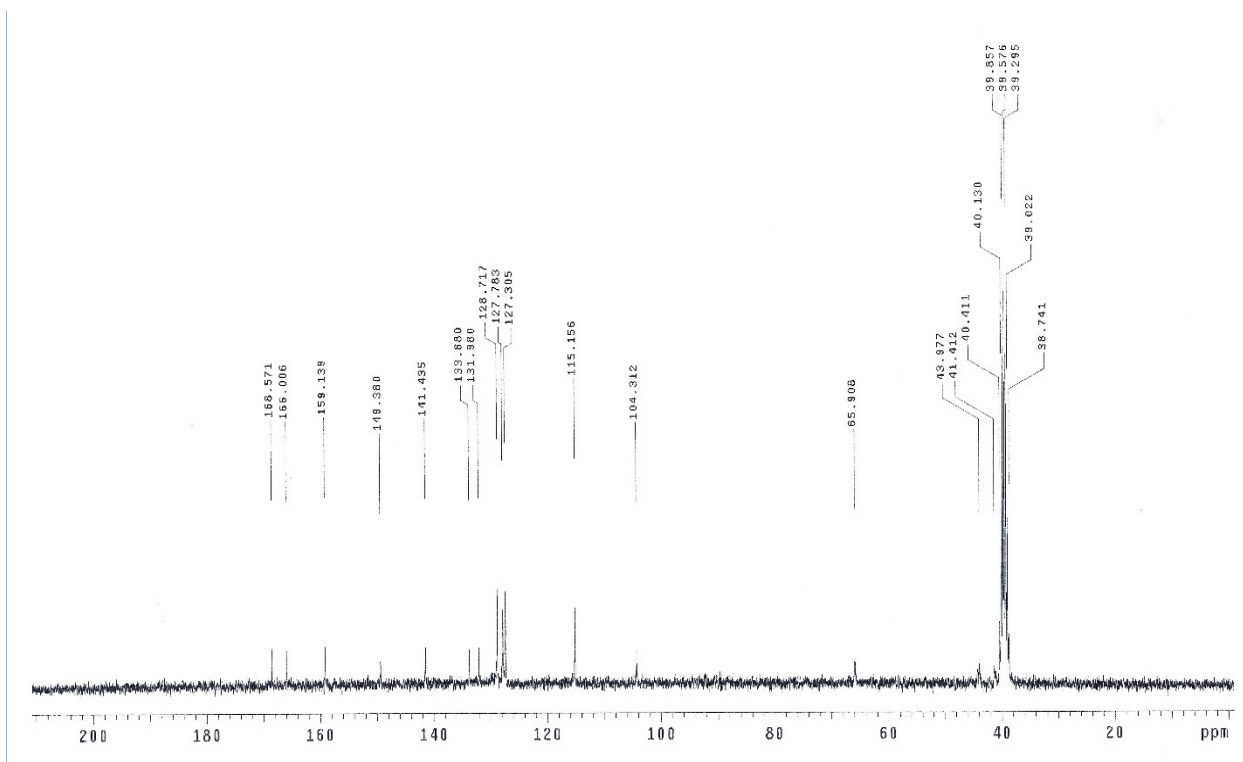





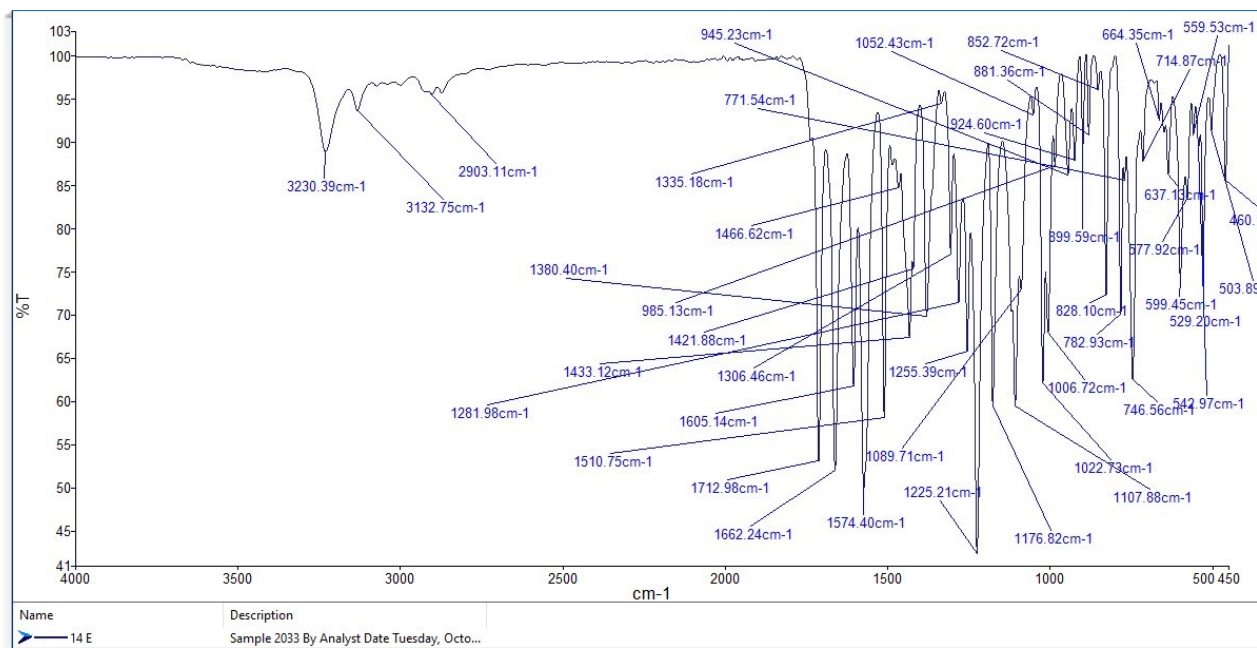

**Fig. S64.** IR spectrum of **15e**

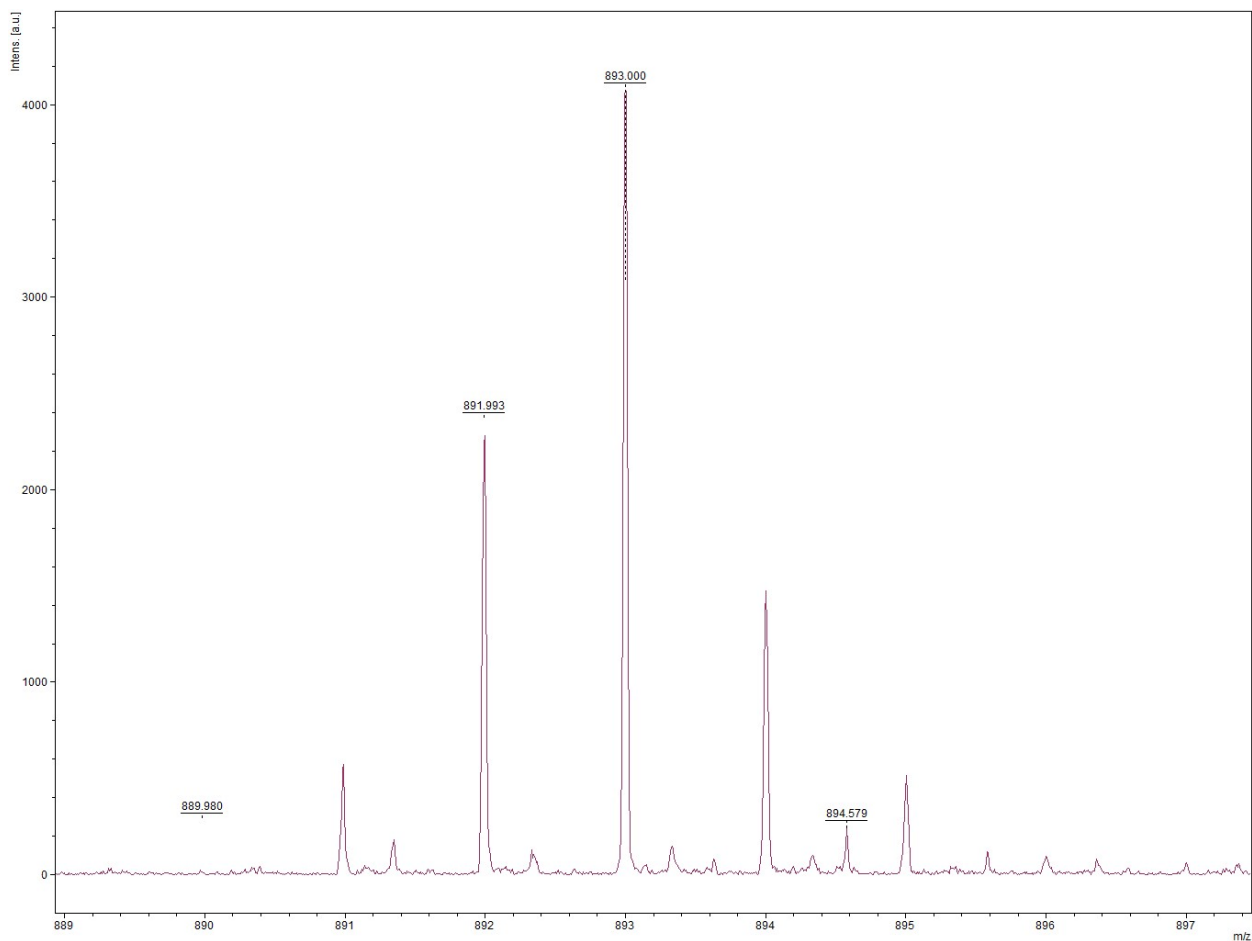

**Fig. S65.** Mass spectrum of **15e**

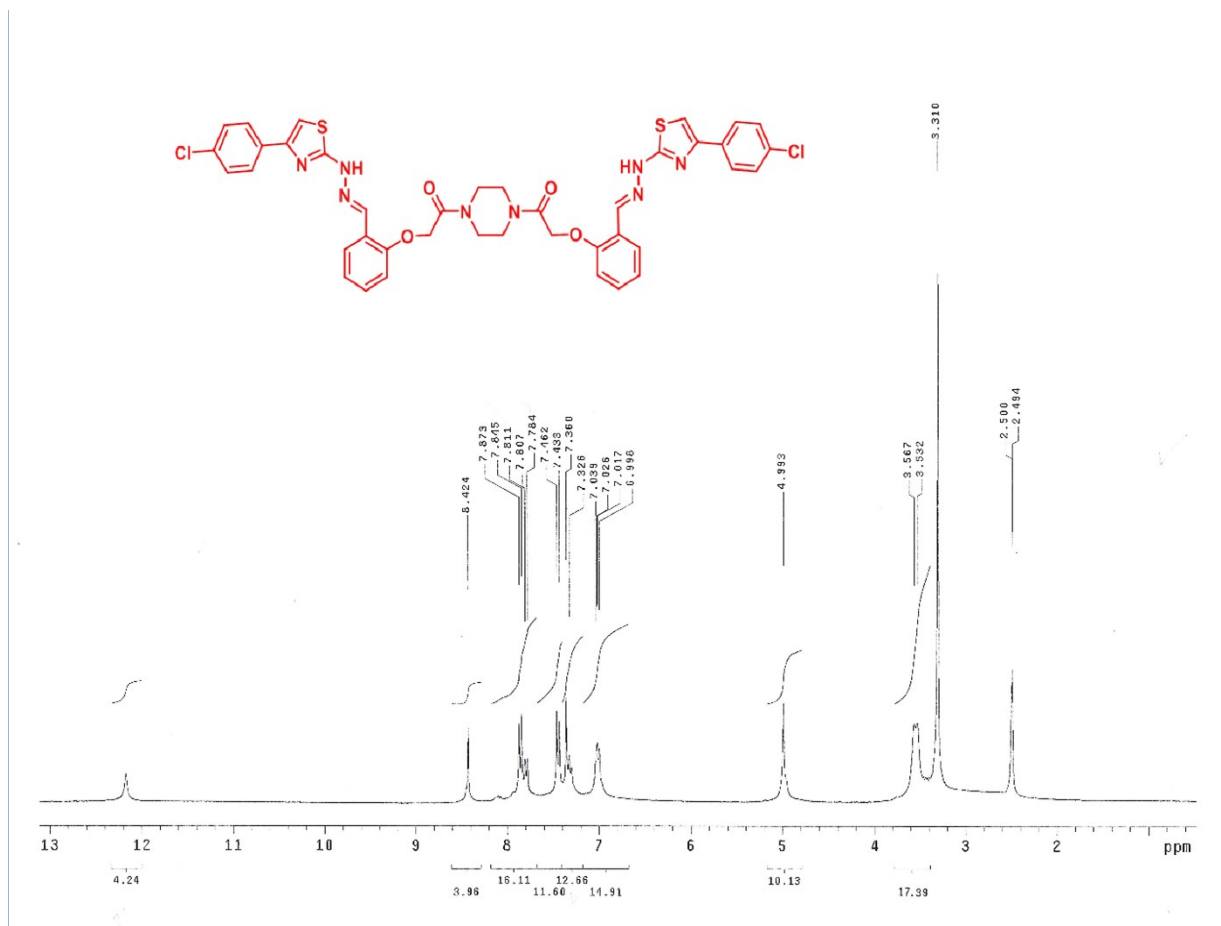

Fig. S66. <sup>1</sup>H NMR spectrum of 15f

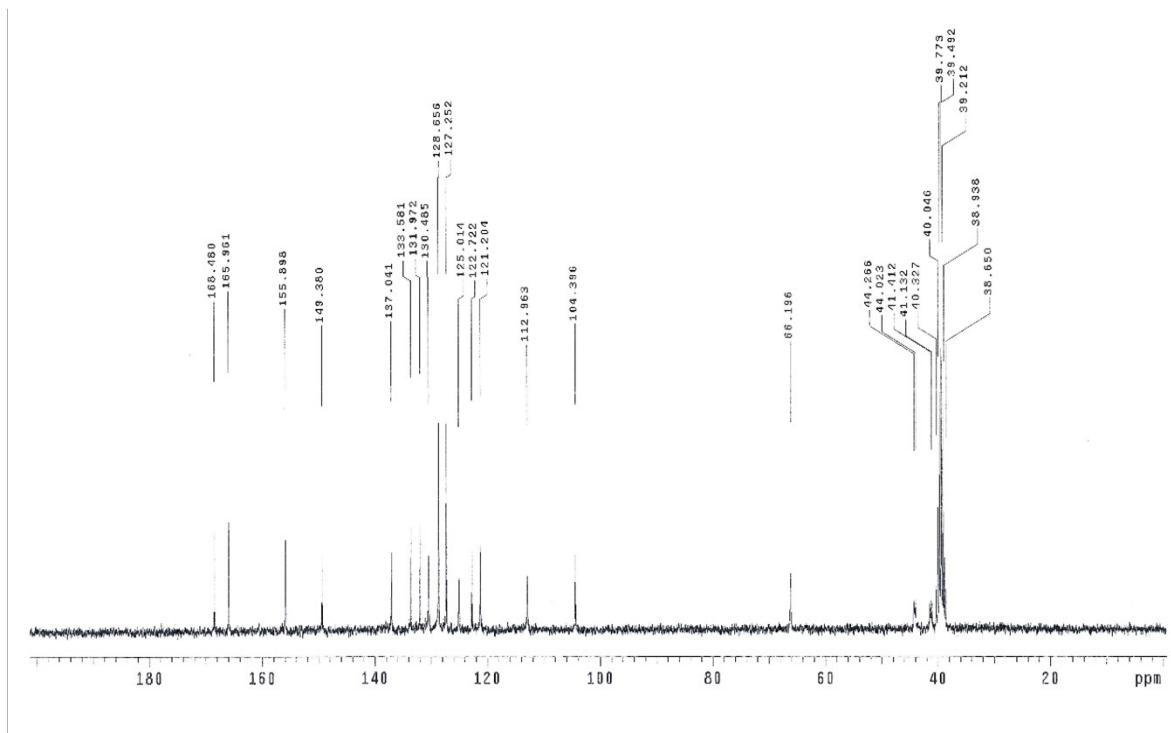

Fig. S67. <sup>13</sup>C NMR spectrum of 15f

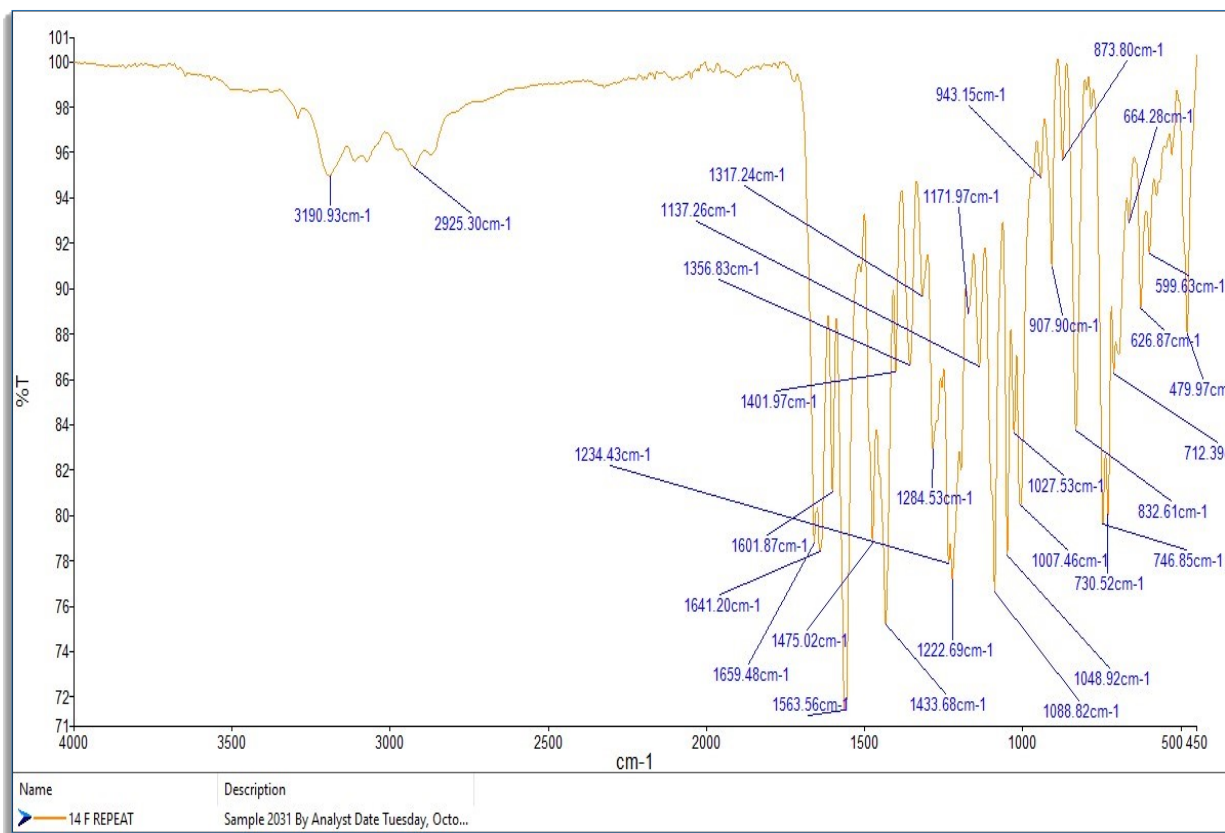

**Fig. S68.** IR spectrum of **15f**

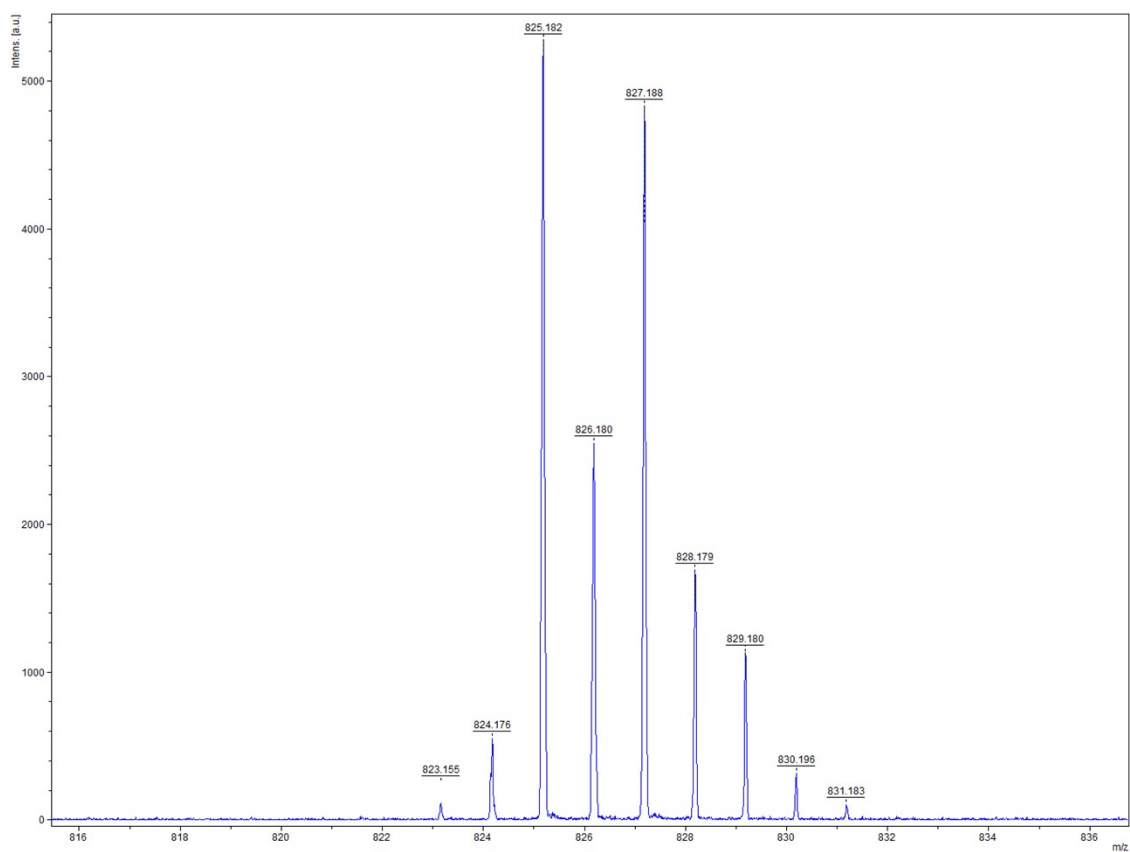

**Fig. S69.** Mass spectrum of **15f**



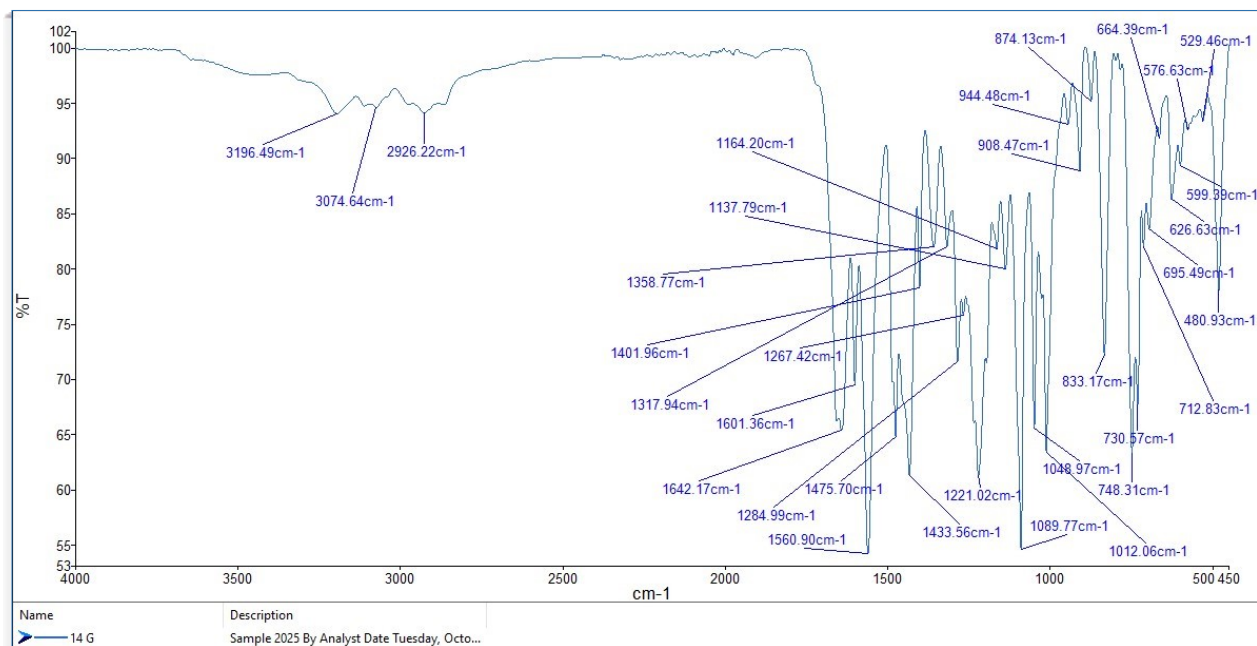

Fig. S72. IR spectrum of 15g

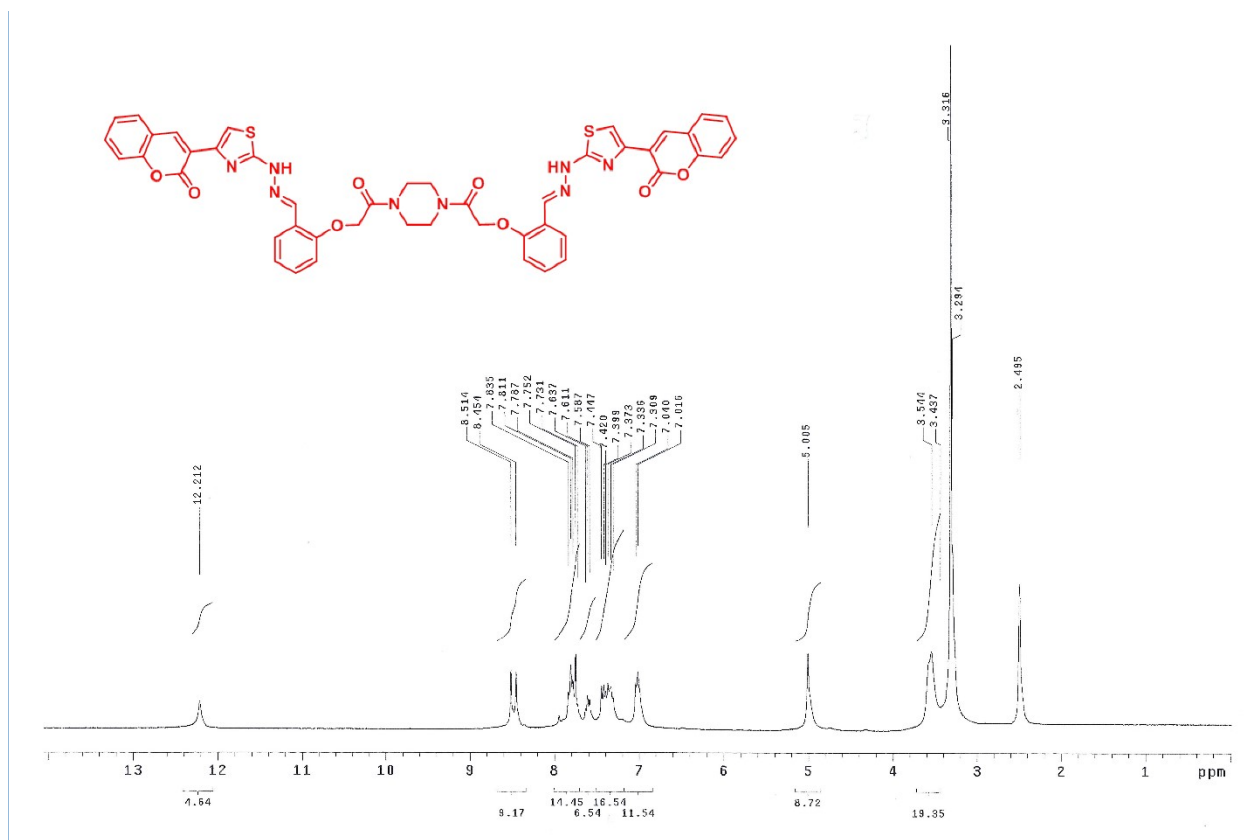

Fig. S73. <sup>1</sup>H NMR spectrum of 15h

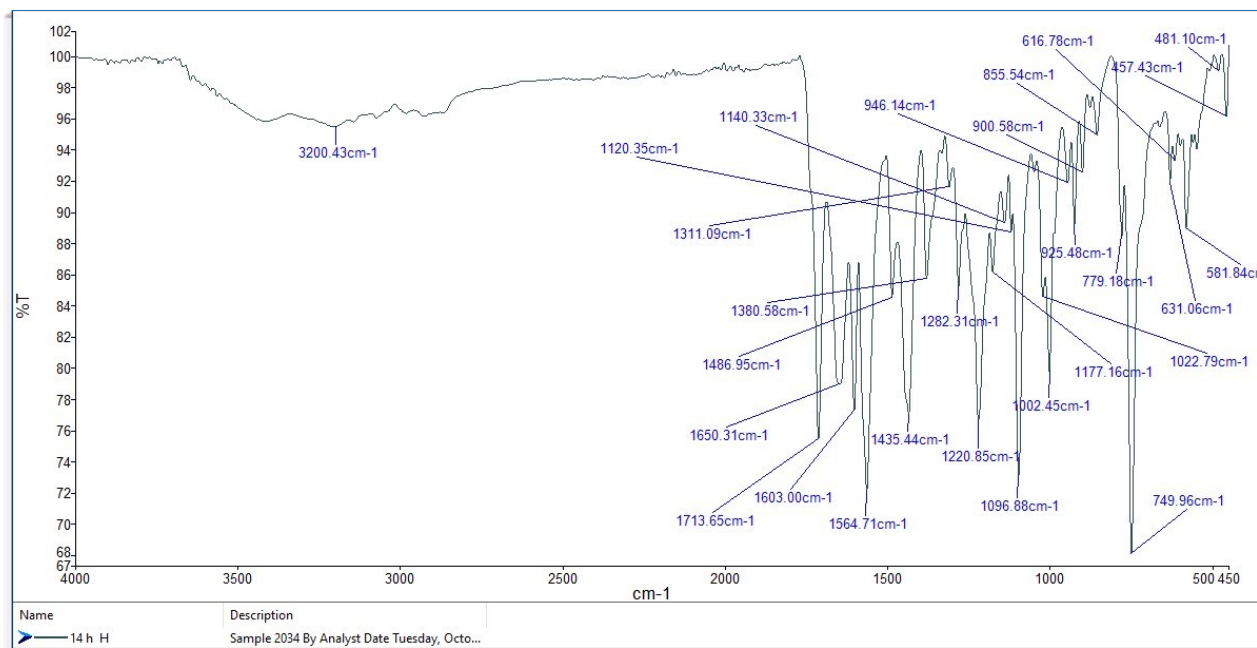

**Fig. S74.** IR spectrum of **15h**

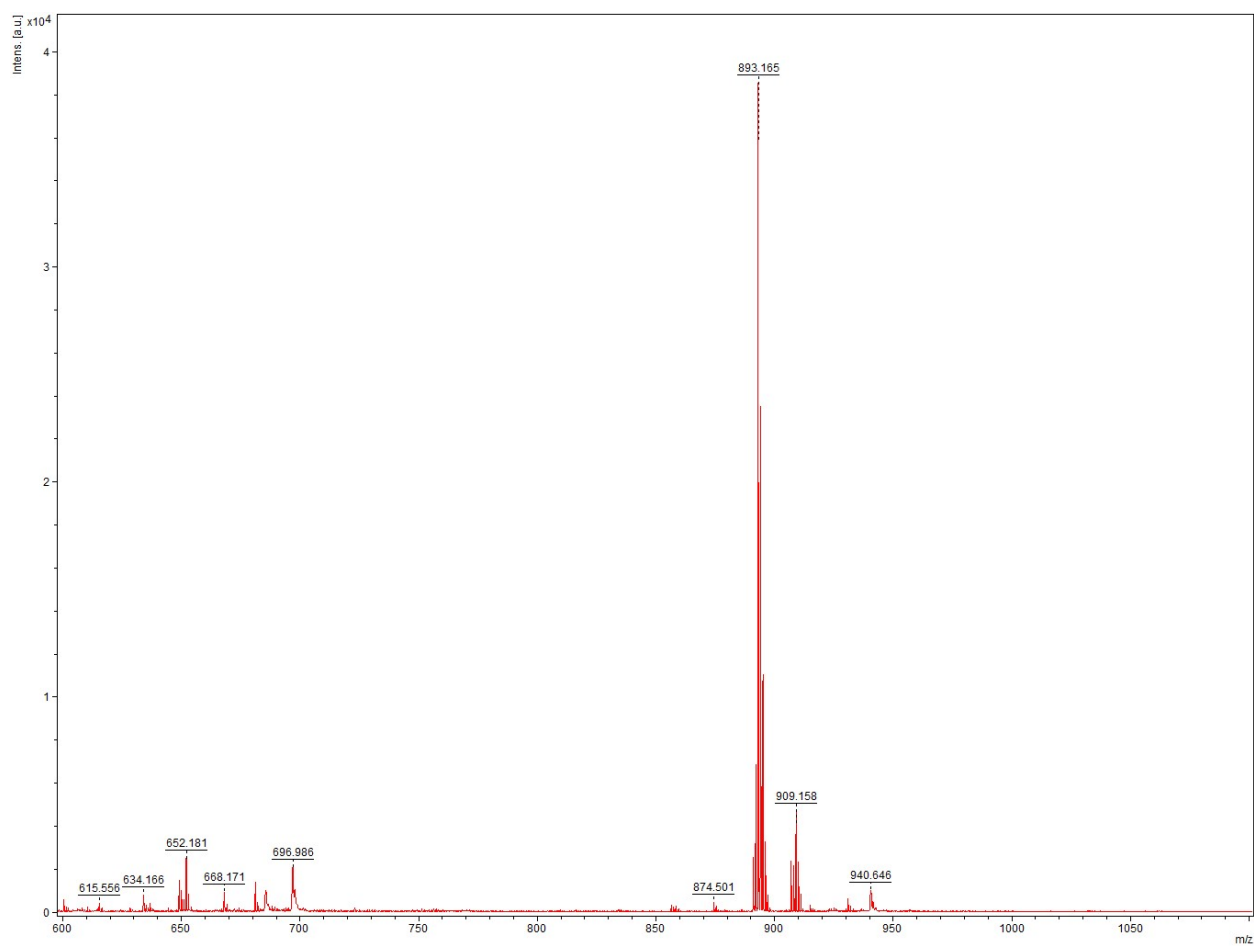

**Fig. S75.** Mass spectrum of **15h**
